# Supplementary material
Source: ML conference proceedings conference paper supplement (https://proceedings.mlr.press/v89/oliveira19a.html)
Supplement: Supplementary file [file oliveira19a-supp.pdf]

---

# Bayesian optimisation under uncertain inputs

---

Rafael Oliveira<sup>1</sup>

Lionel Ott<sup>1</sup>

Fabio Ramos<sup>1,2</sup>

<sup>1</sup>School of Computer Science, The University of Sydney, Australia. <sup>2</sup>NVIDIA, USA.

## Abstract

Bayesian optimisation (BO) has been a successful approach to optimise functions which are expensive to evaluate and whose observations are noisy. Classical BO algorithms, however, do not account for errors about the location where observations are taken, which is a common issue in problems with physical components. In these cases, the estimation of the actual query location is also subject to uncertainty. In this context, we propose an upper confidence bound (UCB) algorithm for BO problems where both the outcome of a query and the true query location are uncertain. The algorithm employs a Gaussian process model that takes probability distributions as inputs. Theoretical results are provided for both the proposed algorithm and a conventional UCB approach within the uncertain-inputs setting. Finally, we evaluate each method’s performance experimentally, comparing them to other input noise aware BO approaches on simulated scenarios involving synthetic and real data.

## 1 Introduction

Bayesian optimisation (BO) (Shahriari et al., 2016) is a technique to find the global optimum of functions that are unknown, expensive to evaluate, and whose output observations are possibly noisy. In this sense, BO has been applied across different fields to a wide class of problems, including hyper-parameter tuning (Snoek et al., 2012), policy search (Wilson et al., 2014), environmental monitoring (Marchant and Ramos, 2012), robotic grasping (Nogueira et al., 2016), etc. Although taking into account that we might have a noisy obser-

vation of the function’s output, conventional BO approaches assume that the function has been sampled precisely at a specified query location. While this is true for many applications of BO, there are certain problems, especially in areas of robotics and process control, in which this assumption typically does not hold.

As an illustration, consider a problem where we are interested in finding the peak of an environmental process  $f(\mathbf{x})$  over a region  $\mathcal{S} \subset \mathbb{R}^d$ . To this end, we send a mobile robot to different target locations  $\mathbf{x}_t \in \mathcal{S}$  to observe the process. Unfortunately, due to localisation uncertainty and motion control errors, *execution noise* prevents the robot from reaching the planned target location exactly. Instead, after each query, the robot provides us with an estimate of its actual location  $\tilde{\mathbf{x}}_t$  via a probability distribution  $P_t^L$ , which takes into account *localisation noise*, as depicted in Figure 1. From each query, we obtain a noisy observation of the environmental process  $y_t = f(\tilde{\mathbf{x}}_t) + \zeta_t$ , where  $\zeta_t$  is an independent noise term. In this scenario, both the function inputs  $\tilde{\mathbf{x}}_t$ , i.e. query locations, and outputs  $f(\tilde{\mathbf{x}}_t)$  are not directly observable.

This paper investigates optimisation problems where input noise affects both the execution of a query and the estimation of its true location. In particular, we analyse the standard BO approach when employing the improved Gaussian process upper-confidence bound (IGP-UCB) (Chowdhury and Gopalan, 2017) algorithm under input noise, and we propose the *uncertain-inputs Gaussian process upper confidence bound* (uGP-UCB) algorithm. The latter is equipped with a GP model that takes probability distributions as inputs in a similar framework to Oliveira et al. (2017). We apply kernel embeddings techniques (Muandet et al., 2016) to obtain the first theoretical results for BO under uncertain inputs, bounding the regret of both uGP-UCB and IGP-UCB. In addition, experiments provide empirical performance evaluations of different BO approaches to problems involving input noise.

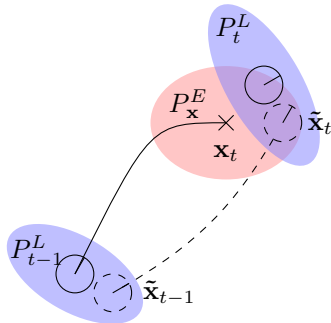

Figure 1: At time  $t - 1$ , the robot is estimated to be at some  $\tilde{\mathbf{x}}_{t-1} \sim P_{t-1}^L$ . It is then sent to target location  $\mathbf{x}_t$ . However, due to uncertainty in the query execution, represented by  $P_{\mathbf{x}}^E$ , the robot actually ends up at another location  $\tilde{\mathbf{x}}_t$ , whose belief distribution, according to the localisation system, is represented by  $P_t^L$ . The robot’s true locations and true path are indicated by the dashed lines.

## 2 Related work

Recently several BO approaches that deal with problems where the execution of queries to an objective function is affected by uncertainty have been proposed. Nogueira et al. (2016) presented a method that applies the unscented transform (Wan and van der Merwe, 2000) to query BO’s acquisition function. By considering a stochastic query execution process, the method is able to find robust solutions to robotics problems such as grasping. Another approach to handle query uncertainty is presented in Pearce and Branke (2017) to optimise stochastic simulations. In that case, query uncertainty refers to imperfect knowledge about input variates for a simulation model (Lam, 2016). Pearce and Branke apply Monte Carlo integration to marginalise out input variates that are unknown when querying BO’s acquisition function. In broader terms, all of these problems can be described as optimising an integrated cost function, where one may instead use a GP prior over the integrated function (Beland and Nair, 2017; Toscano-Palmerin and Frazier, 2018). Contrasted to uGP-UCB, however, the approaches mentioned above only deal with independent and identically distributed input noise and mostly offer no known theoretical guarantees. In addition, the data points in their GP datasets are only point estimates, instead of distributions as used in this paper.

Another BO approach is presented in Oliveira et al. (2017), which employed a Gaussian process (GP) model that takes probability distributions directly as inputs (Girard, 2004; Dallaire et al., 2011). However, Oliveira et al.’s method intent is to learn a model of

the objective function with a robot, while minimising travelled distance, not as an optimisation framework.

Problems like the one illustrated in Figure 1 can also be related to partially-observable Markov decision processes (POMDPs) (Marchant and Ramos, 2014; Ling et al., 2016). This paper, however, is concerned with a general optimisation setup.

## 3 Problem formulation

We consider an optimisation problem where an algorithm sequentially selects target locations  $\mathbf{x}_t$  within a compact search space  $\mathcal{S} \subset \mathcal{X}$  at which to query a function  $f : \mathcal{X} \rightarrow \mathbb{R}$ , seeking its global optimum. In addition, the query execution itself is a stochastic process, leading the query to be made at some  $\tilde{\mathbf{x}}_t | \mathbf{x}_t \sim P_{\mathbf{x}}^E$ , instead.

How close the algorithm is to the global optimum can be measured in terms of regret. In a bandits optimisation setting, the *instantaneous regret* suffered by a maximisation algorithm for a choice of target  $\mathbf{x}_t$  in our problem is given by:

$$\tilde{r}_t = \max_{\mathbf{x} \in \mathcal{S}} f(\mathbf{x}) - f(\tilde{\mathbf{x}}_t). \quad (1)$$

In the deterministic-inputs case, the algorithmic design goal is to minimise cumulative regret, ensuring that the algorithm eventually hits the global optimum of  $f$  (Srinivas et al., 2010; Bull, 2011). However, as  $\tilde{\mathbf{x}}_t$  is subject to noise, one can attempt to minimise the expected regret, which is such that:

$$\mathbb{E}[\tilde{r}_t | \mathbf{x}_t] = \max_{\mathbf{x} \in \mathcal{S}} f(\mathbf{x}) - \mathbb{E}[f(\tilde{\mathbf{x}}_t) | \mathbf{x}_t] = \rho_E + \hat{r}_t, \quad (2)$$

where:

$$\rho_E := \max_{\mathbf{x} \in \mathcal{S}} f(\mathbf{x}) - \max_{\tilde{\mathbf{x}} \in \mathcal{S}} \mathbb{E}[f(\tilde{\mathbf{x}}) | \mathbf{x}] \quad (3)$$

$$\hat{r}_t := \max_{\mathbf{x} \in \mathcal{S}} \mathbb{E}[f(\tilde{\mathbf{x}}) | \mathbf{x}] - \mathbb{E}[f(\tilde{\mathbf{x}}_t) | \mathbf{x}_t]. \quad (4)$$

Here  $\rho_E$  is a constant, representing the difference between the maximum of the function and the maximum value any algorithm is expected to reach under the query execution uncertainty. However,  $\hat{r}_t$  is controllable via the algorithm’s choices of  $\mathbf{x}_t$  and is associated with the goal of finding:

$$\mathbf{x}^* \in \operatorname{argmax}_{\mathbf{x} \in \mathcal{S}} \mathbb{E}[f(\tilde{\mathbf{x}}) | \mathbf{x}], \quad (5)$$

which defines a target location that maximises the expected value of the function  $f$  under the querying process noise. As defined,  $\mathbf{x}^*$  minimises the expected regret to a lower bound given by  $\rho_E$  and defines an optimum location which is robust to execution noise. Therefore, we call  $\hat{r}_t$  the *uncertain-inputs*

*regret*. Similarly, we also define the *uncertain-inputs cumulative regret*  $\hat{R}_n = \sum_{t=1}^n \hat{r}_t$ . With these definitions, an algorithm whose uncertain-inputs cumulative regret  $\hat{R}_n$  grows sub-linearly achieves a minimum on the expected regret:

$$\begin{aligned} \lim_{n \rightarrow \infty} \min_{t \leq n} \mathbb{E}[\hat{r}_t | \mathbf{x}_t] &= \rho_E + \lim_{n \rightarrow \infty} \min_{t \leq n} \hat{r}_t \\ &\leq \rho_E + \limsup_{n \rightarrow \infty} \frac{\hat{R}_n}{n} = \rho_E . \end{aligned} \quad (6)$$

**Distribution assumptions:** We are assuming that the query location distribution  $P_{\mathbf{x}}^E$  marginalises over all other variables that could affect the querying process, such as starting points and effects from the environment that the agent is in. In addition, the true  $P_{\mathbf{x}}^E$  might be unknown. However, *after* each query, we assume that a distribution  $P_t^L$  estimating the true query location is available. These probability distributions are illustrated by the example in Figure 1 for a robotics case.

For each  $\mathbf{x}_t$ , the algorithm is provided with observations  $y_t = f(\tilde{\mathbf{x}}_t) + \zeta_t$ , where  $\zeta_t$  is  $\sigma_\zeta$ -sub-Gaussian observation noise, for some  $\sigma_\zeta \geq 0$ . Sub-Gaussian random variables can be thought of as any random variable whose tail distribution decays at least as fast as a Gaussian. Both Gaussian and bounded random variables fall in this category (Boucheron et al., 2013).

**Regularity assumptions:** We assume  $f : \mathcal{X} \rightarrow \mathbb{R}$  to be an element of  $\mathcal{H}_k$ , which is a reproducing kernel Hilbert space (RKHS) (Schölkopf and Smola, 2002). For a given positive-definite kernel  $k : \mathcal{X} \times \mathcal{X} \rightarrow \mathbb{R}$ , a RKHS  $\mathcal{H}_k$  is a Hilbert space of functions with inner product  $\langle \cdot, \cdot \rangle_k$  and norm  $\|\cdot\|_k = \sqrt{\langle \cdot, \cdot \rangle_k}$  such that  $f(\mathbf{x}) = \langle f, k(\cdot, \mathbf{x}) \rangle_k$ , for any  $f \in \mathcal{H}_k$  and any  $\mathbf{x} \in \mathcal{X}$ . We assume  $k$  is continuous and bounded on  $\mathcal{X} \times \mathcal{X}$ , with  $k(\mathbf{x}, \mathbf{x}) \leq 1, \forall \mathbf{x} \in \mathcal{X}$ , and that  $\|f\|_k \leq b$  for the objective function in Equation 5, where  $b > 0$  is known.<sup>1</sup> When not explicitly mentioned, assume an Euclidean domain for  $f$ , i.e.  $\mathcal{X} \subseteq \mathbb{R}^d, d \in \mathbb{N}$ .

## 4 The uGP-UCB algorithm

This section describes a method for Bayesian optimisation under uncertain inputs. The section starts by presenting a Gaussian process that allows direct modelling of objectives defined in terms of expectations. This GP approach is then applied to derive a BO algorithm named *uncertain-inputs Gaussian process upper confidence bound* (uGP-UCB), presented in the second part of this section.

<sup>1</sup>These assumptions are met by most of the popular kernels in BO and are common in the regret bounds literature.

### 4.1 Gaussian process priors with uncertain inputs

To extend BO to the case where query locations  $\mathbf{x}$  are uncertain, we can redefine the objective in Equation 5 as a function of the query probability distributions. Let  $\mathcal{P}$  denote the set containing all probability measures on  $\mathcal{X} \subseteq \mathbb{R}^d$ . With  $f \in \mathcal{H}_k$ , we can define the map:

$$\begin{aligned} \psi : \mathcal{P} &\rightarrow \mathcal{H}_k \\ P &\mapsto \int_{\mathcal{X}} k(\cdot, \mathbf{x}) dP(\mathbf{x}) . \end{aligned} \quad (7)$$

For any  $\mathcal{X}$ -valued random variable  $\tilde{\mathbf{x}}$  distributed according to  $P \in \mathcal{P}$ , we then have that:

$$\mathbb{E}_P[f] := \mathbb{E}[f(\tilde{\mathbf{x}})] = \langle \psi_P, f \rangle_k, \quad \forall f \in \mathcal{H}_k, \quad (8)$$

where  $\psi_P := \psi(P)$ . If the kernel  $k$  is characteristic, such as radial kernels (Sriperumbudur et al., 2011),  $\psi$  is injective, defining a one-to-one relationship between measures in  $\mathcal{P}$  and elements of  $\mathcal{H}_k$ . Therefore,  $\psi$  is referred to as the mean map, and  $\psi_P$  as the kernel mean embedding of  $P$  (Muandet et al., 2016).

Using  $\psi$  as defined in Equation 7, one can construct kernels over the set of probability measures  $\mathcal{P}$ . In particular, for any  $P, P' \in \mathcal{P}$ , we have that:

$$\hat{k}(P, P') := \langle \psi_P, \psi_{P'} \rangle_k = \int_{\mathcal{X}} \int_{\mathcal{X}} k(\mathbf{x}, \mathbf{x}') dP(\mathbf{x}) dP'(\mathbf{x}') \quad (9)$$

defines a positive-definite kernel over  $\mathcal{P}$  (Muandet et al., 2012). Notice that in this formulation, even if we have inputs representing the same random variable  $\tilde{\mathbf{x}} \sim P$ , we have  $\hat{k}(P, P) = \langle \psi_P, \psi_P \rangle_k \neq \mathbb{E}[k(\tilde{\mathbf{x}}, \tilde{\mathbf{x}})]$ , which is then different from other kernel formulations for models with uncertain inputs (Dallaire et al., 2011).

The kernel in Equation 9 is associated with a RKHS  $\mathcal{H}_{\hat{k}}$  containing functions over the space of probability measures  $\mathcal{P}$ . Besides the linear kernel in Equation 9, many other kernels on  $\mathcal{P}$  can be defined via  $\psi$ , e.g. radial kernels using  $\|\psi_P - \psi_{P'}\|_k$  as a metric on  $\mathcal{P}$  (Muandet et al., 2012). However, the simple kernel in Equation 9 provides us with a useful property to model the objective in Equation 5, as presented next.

**Lemma 1** (Expected function). *Any  $f \in \mathcal{H}_k$  is continuously mapped to a corresponding  $\hat{f} \in \mathcal{H}_{\hat{k}}$ , which is such that:*

$$\begin{aligned} \forall P \in \mathcal{P}, \quad \hat{f}(P) &= \mathbb{E}_P[f] \\ \|\hat{f}\|_{\hat{k}} &= \|f\|_k . \end{aligned} \quad (10)$$

*The mapping  $f \mapsto \hat{f}$  constitutes an isometric isomorphism between  $\mathcal{H}_k$  and  $\mathcal{H}_{\hat{k}}$ .*

*Proof sketch.* The proof follows from the fact that Dirac measures  $D_{\mathbf{x}}$ , for  $\mathbf{x} \in \mathcal{X}$ , are also probability measures in  $\mathcal{P}$ . Since  $k(\mathbf{x}, \mathbf{x}') = \hat{k}(D_{\mathbf{x}}, D_{\mathbf{x}'})$ ,  $\forall \mathbf{x}, \mathbf{x}' \in \mathcal{X}$ , we can define a bijective linear map between  $\mathcal{H}_k$  and  $\mathcal{H}_{\hat{k}}$  that preserves norms. A complete proof is presented in the appendix.  $\square$

As a positive-definite kernel,  $\hat{k}$  defines the covariance function of a Gaussian process  $\text{GP}(0, \hat{k})$  modelling functions over  $\mathcal{P}$ . This GP model can then be applied to learn  $\hat{f}$  from a given set of observations  $\mathcal{D}_n = \{(P_i, y_i)\}_{i=1}^n$ , as in Girard (2004). Under a zero-mean GP assumption, the value of  $\hat{f}(P_*)$  for a given  $P_* \in \mathcal{P}$  follows a Gaussian posterior distribution with mean and variance given by:

$$\hat{\mu}_n(P_*) = \hat{\mathbf{k}}_n(P_*)^\top (\hat{\mathbf{K}}_n + \lambda \mathbf{I})^{-1} \mathbf{y}_n, \quad (11)$$

$$\hat{k}_n(P, P') = \hat{k}(P, P') - \hat{\mathbf{k}}_n(P)^\top (\hat{\mathbf{K}}_n + \lambda \mathbf{I})^{-1} \hat{\mathbf{k}}_n(P') \quad (12)$$

$$\hat{\sigma}_n^2(P_*) = \hat{k}_n(P_*, P_*), \quad (13)$$

where  $\mathbf{y}_n := [y_1, \dots, y_n]^\top$ ,  $[\hat{\mathbf{K}}_n]_{ij} = \hat{k}(P_i, P_j)$  and  $\hat{\mathbf{k}}_n(P_*) := [\hat{k}(P_*, P_1), \dots, \hat{k}(P_*, P_n)]^\top$ . For a  $\hat{f} \in \mathcal{H}_{\hat{k}}$ , we have that  $\hat{f}$  is generally not a sample from the GP (Rasmussen and Williams, 2006, p. 131). However, we always have  $\hat{\mu}_n \in \mathcal{H}_{\hat{k}}$  by definition, allowing the GP to learn an approximation for  $\hat{f}$ . Therefore, in these equations,  $\lambda \geq 0$  is simply a parameter that is not necessarily related to the true observation noise as in usual GP modelling assumptions (Rasmussen and Williams, 2006).

## 4.2 Upper-confidence bound

Coming back to the problem definition in Equation 5, we consider a function  $\hat{f} : \mathcal{P} \rightarrow \mathbb{R}$ , such that for any  $\tilde{\mathbf{x}} \sim P$ ,  $\hat{f}(P) = \mathbb{E}[f(\tilde{\mathbf{x}})]$ . The GP model proposed in the previous section allows deriving a BO algorithm to solve the problem in Equation 5. Given a set of past observations  $\mathcal{D}_{t-1} = \{(P_i, y_i)\}_{i=1}^{t-1}$ , the following defines an upper confidence bound (UCB) acquisition function:

$$h(P|\mathcal{D}_{t-1}) = \hat{\mu}_{t-1}(P) + \beta_t \hat{\sigma}_{t-1}(P), \quad (14)$$

where  $\beta_t$  is a parameter controlling the exploration-exploitation trade-off. The theoretical results in the next section will show that  $\beta_t$  can be set accordingly for  $h(P|\mathcal{D}_{t-1})$  to maintain a high-probability upper bound on  $\hat{f}$ .

Querying the GP model with  $\mathbf{x} \mapsto P_{\mathbf{x}}^E$  would allow selecting points  $\mathbf{x}_t$  based on an estimate for  $\mathbb{E}_{P_{\mathbf{x}_t}^E}[f] := \mathbb{E}[f(\tilde{\mathbf{x}}_t)|\mathbf{x}_t]$ . However, in general, the true mapping  $\mathbf{x} \mapsto P_{\mathbf{x}}^E$  is unknown. Instead, we use a model  $\mathbf{x} \mapsto \hat{P}_{\mathbf{x}}$  whose approximation error  $|\mathbb{E}_{P_{\mathbf{x}}^E}[f] - \mathbb{E}_{\hat{P}_{\mathbf{x}}}[f]|$  is small.

---

### Algorithm 1: uGP-UCB

---

**Input:**  $\mathcal{S}$ : search space

$n$ : total number of iterations

1 **for**  $t \in \{1, \dots, n\}$  **do**

2      $\mathbf{x}_t = \underset{\mathbf{x} \in \mathcal{S}}{\text{argmax}} \hat{\mu}_{t-1}(\hat{P}_{\mathbf{x}}) + \beta_t \hat{\sigma}_{t-1}(\hat{P}_{\mathbf{x}})$

3      $(P_t^L, y_t) \leftarrow \text{Sample } f \text{ at } \tilde{\mathbf{x}}_t | \mathbf{x}_t \sim P_{\mathbf{x}_t}^E$

4      $\mathcal{D}_t = \mathcal{D}_{t-1} \cup \{(P_t^L, y_t)\}$

5  $\mathbf{x}_n^* = \underset{\mathbf{x}_t \in \mathcal{D}_n}{\text{argmax}} \hat{\mu}_n(\hat{P}_{\mathbf{x}_t})$

**Result:**  $\mathbf{x}_n^*$

---

Algorithm 1 presents the uGP-UCB algorithm. Equipped with the acquisition function in Equation 14, at each iteration  $t$ , the algorithm selects the target location  $\mathbf{x}_t$  that maximises  $h(\hat{P}_{\mathbf{x}}|\mathcal{D}_{t-1})$  (line 2). In line 3, the function  $f$  is queried at some location  $\tilde{\mathbf{x}}_t | \mathbf{x}_t \sim P_{\mathbf{x}_t}^E$ . After the query is done, the algorithm is provided with an observation  $y_t = f(\tilde{\mathbf{x}}_t) + \zeta_t$  and an independent estimate for  $\tilde{\mathbf{x}}_t$  given by  $P_t^L$ , as described earlier. In line 4, the GP model is updated with the new observation pair  $(P_t^L, y_t)$ . This process then repeats for a given number of iterations  $n$ . As a result, the algorithm finishes with an estimate of the optimum location  $\mathbf{x}^*$  given as the target location with the best estimated outcome  $\mathbf{x}_n^*$  (line 5).

## 5 Theoretical results

This section presents theoretical results bounding the uncertain-inputs regret of the uGP-UCB algorithm and a standard BO approach, IGP-UCB (Chowdhury and Gopalan, 2017), which was not originally designed to handle input noise. The theoretical analysis presented in this paper is mainly based on Chowdhury and Gopalan's results, which are advantageous in the uncertain-inputs setting due to mild assumptions on the observation noise. However, the results in this section also bring new insights into BO methods for problems with uncertain inputs. We refer the reader to the appendix for complete proofs of the next results.

### 5.1 The uncertain-inputs regret of IGP-UCB

In the uncertain-inputs setting, IGP-UCB selects target locations  $\mathbf{x}_t$  by maximising  $\mu_{t-1}(\mathbf{x}) + \beta_t \sigma_{t-1}(\mathbf{x})$ , where  $\mu_{t-1}$  and  $\sigma_{t-1}^2$  are respectively the posterior mean and variance of the deterministic-inputs  $\text{GP}(0, k)$  given observations  $\{(\mathbf{x}_i, y_i)\}_{i=1}^{t-1}$ . For an asymptotic analysis, both the targets  $\{\mathbf{x}_t\}_{t=1}^\infty$  and the equivalent observation noise  $\{\nu_t\}_{t=1}^\infty$ , where  $\nu_t := y_t - \mathbb{E}[f(\tilde{\mathbf{x}}_t)|\mathbf{x}_t] \neq \zeta_t$ , can be treated as sequences of random variables. At a given round  $t \geq 1$ , the history  $\{\mathbf{x}_i, \nu_i\}_{i=1}^t$  generates a  $\sigma$ -algebra  $\mathfrak{F}_t$ , and the sequence

$\{\mathfrak{F}_t\}_{t=0}^\infty$  defines a filtration (Bauer, 1981). The sub-Gaussian condition on the sequence  $\{\nu_t\}_{t=1}^\infty$  is then formally defined as:

$$\forall t \geq 1, \forall \lambda \in \mathbb{R}, \quad \mathbb{E}[e^{\lambda \nu_t} | \mathfrak{F}_{t-1}] \leq e^{\lambda^2 \sigma_\nu^2 / 2} \text{ (a.s.)}, \quad (15)$$

which denotes an upper bound on a conditional expectation (Bauer, 1981), so that the inequality above is defined as holding *almost surely* (a.s.).

The results in Chowdhury and Gopalan (2017) bound the cumulative regret of IGP-UCB in terms of the maximum information gain:

$$\gamma_n := \max_{\mathcal{Q} \subset \mathcal{S}: |\mathcal{Q}|=n} I(\mathbf{y}_n, \mathbf{g}_n | \mathcal{Q}), \quad (16)$$

where  $I(\mathbf{y}_n, \mathbf{g}_n | \mathcal{Q})$  represents the mutual information between  $\mathbf{y}_n = \mathbf{g}_n + \boldsymbol{\nu}'_n$  and  $\mathbf{g}_n \sim N(\mathbf{0}, \mathbf{K}_n)$ , with  $[\mathbf{K}_n]_{ij} = k(\mathbf{x}_i, \mathbf{x}_j)$ ,  $\mathbf{x}_i, \mathbf{x}_j \in \mathcal{Q}$  and  $\boldsymbol{\nu}'_n \sim N(\mathbf{0}, \lambda \mathbf{I})$ . Here  $\lambda > 0$  is the same parameter in Equation 11. Considering these definitions, we derive the following.

**Theorem 2** (IGP-UCB uncertain-inputs regret). *For any  $f \in \mathcal{H}_k$ , assume that:*

1. *the mapping  $\mathbf{x} \mapsto \mathbb{E}_{P_{\mathbf{x}}^E}[f]$  defines a function  $g \in \mathcal{H}_k(\mathcal{S})$  and  $\|g\|_k \leq b$ ;*
2.  *$\forall \mathbf{x} \in \mathcal{S}, \Delta f_{P_{\mathbf{x}}^E} := f(\tilde{\mathbf{x}}^E) - \mathbb{E}_{P_{\mathbf{x}}^E}[f]$  is  $\sigma_E$ -sub-Gaussian, for a given  $\sigma_E > 0$ , where  $\tilde{\mathbf{x}}^E \sim P_{\mathbf{x}}^E$ ;*
3. *and  $\zeta_t$  is conditionally  $\sigma_\zeta$ -sub-Gaussian.*

Then running IGP-UCB with  $\sigma_\nu := \sqrt{\sigma_E^2 + \sigma_\zeta^2}$  and  $\beta_t := b + \sigma_\nu \sqrt{2(\gamma_{t-1} + 1 + \log(1/\delta))}$  leads to the same bounds as Theorem 3 in Chowdhury and Gopalan (2017) for the uncertain-inputs cumulative regret of the algorithm. Namely, we have that:

$$\mathbb{P}\left\{\hat{R}_n \in \mathcal{O}\left(b\sqrt{n\gamma_n} + \sigma_\nu \sqrt{n(\gamma_n + \log(1/\delta))}\right)\right\} \geq 1 - \delta. \quad (17)$$

*Proof sketch.* Considering Theorem 3 in Chowdhury and Gopalan (2017), the proof follows almost immediately from the assumptions above. The only detail to notice is that  $\nu_t := y_t - g(\mathbf{x}_t) = \zeta_t + f(\tilde{\mathbf{x}}_t) - \mathbb{E}[f(\tilde{\mathbf{x}}_t) | \mathbf{x}_t] = \zeta_t + \Delta f_{P_{\mathbf{x}_t}^E}$ , which is a  $\sigma_\nu$ -sub-Gaussian random variable for  $\sigma_\nu^2 = \sigma_\zeta^2 + \sigma_E^2$ .  $\square$

The result above states that, as long as  $\sigma_\nu$  is large enough to accommodate for the additional variance in the observations due to noisy-inputs, IGP-UCB maintains bounded regret. Theoretical results bounding the growth of  $\gamma_n$  are available in the literature. For the squared-exponential kernel on  $\mathbb{R}^d$ , for example,  $\gamma_n \in \mathcal{O}((\log n)^{d+1})$  (Srinivas et al., 2010, Thr. 5),

so that IGP-UCB obtains asymptotically vanishing uncertain-inputs regret in this case. However, it is possible that the resulting  $\sigma_\nu$  makes  $\beta_t$  impractically large, leading to excessive exploration. The following result addresses these issues.

**Proposition 3.** *Let  $k : \mathbb{R}^d \times \mathbb{R}^d \rightarrow \mathbb{R}$  be an at least twice-differentiable positive-definite kernel with finite  $\ell_k^2 \geq \sup_{\mathbf{x} \in \mathbb{R}^d} \sup_{i \in [d]} \left. \frac{\partial^2 k(\mathbf{x}, \mathbf{x}')}{\partial x_i \partial x'_i} \right|_{\mathbf{x}=\mathbf{x}'}$ . Then, for  $P \in \mathcal{P}$  and  $\tilde{\mathbf{x}} \sim P$ , we have that  $\Delta f_P := f(\tilde{\mathbf{x}}) - \mathbb{E}_P[f(\tilde{\mathbf{x}})]$  is  $\sigma_F$ -sub-Gaussian with:*

1.  $\sigma_F = \|f\|_k \ell_k \text{tr}(\boldsymbol{\Sigma})^{1/2}$ , if  $P$  is Gaussian with covariance matrix  $\boldsymbol{\Sigma}$ ;
2.  $\sigma_F = \frac{1}{2} \|f\|_k \ell_k \sqrt{\sum_{i=1}^d \sigma_i^2}$ , if  $P$  has compact support, with  $|\tilde{x}_i - \hat{x}_i| \leq \frac{1}{2} \sigma_i$  for each coordinate  $i$ , where  $\hat{\mathbf{x}} = \mathbb{E}_P[\tilde{\mathbf{x}}]$ .

*Proof sketch.* These results are derived from concentration inequalities for Lipschitz-continuous functions of Gaussian or bounded random variables. For the given kernel, any  $f \in \mathcal{H}_k$  is  $\|f\|_k \ell_k$ -Lipschitz continuous (Steinwart and Christmann, 2008).  $\square$

Proposition 3 says that the second condition in Theorem 2 is met if the execution noise is uniformly bounded or Gaussian. What remains is to verify whether the first assumption in Theorem 2 can be met.

When working with kernel embeddings of conditional distributions, the assumption that  $\mathbf{x} \mapsto \mathbb{E}[f(\tilde{\mathbf{x}}) | \mathbf{x}]$  is an element of  $\mathcal{H}_k$  is known to be met when the domain  $\mathcal{X}$  is discrete, while not necessarily holding for continuous domains (Muandet et al., 2016). As most interesting problems involving uncertain inputs have continuous domains, the following result presents a case where Theorem 2's first assumption holds.

**Proposition 4.** *Let  $\mathbf{x} \mapsto P_{\mathbf{x}}$  be a mapping such that, for any  $\mathbf{x} \in \mathcal{S} \subset \mathcal{X}$ ,  $\tilde{\mathbf{x}} \sim P_{\mathbf{x}} \in \mathcal{P}$  is decomposable as  $\tilde{\mathbf{x}} = \mathbf{x} + \boldsymbol{\epsilon}$ , where  $\boldsymbol{\epsilon}$  is independent and identically distributed, i.e.  $\boldsymbol{\epsilon} \sim P_{\boldsymbol{\epsilon}} \in \mathcal{P}$ . Assume that  $k$  is translation invariant. Then we have that, for any  $f \in \mathcal{H}_k$ , the mapping  $\mathbf{x} \mapsto \mathbb{E}_{P_{\mathbf{x}}}[f]$  defines a function  $g \in \mathcal{H}_k(\mathcal{S})$ , and  $\|g\|_k \leq \|f\|_k$ .*

*Proof sketch.* The proof follows by interpreting  $\boldsymbol{\epsilon}$  as a random translation on  $f$ 's inputs, for any  $f \in \mathcal{H}_k$ . Since  $k$  is translation invariant, the norm of any  $\boldsymbol{\epsilon}$ -shifted function  $f^\boldsymbol{\epsilon}$  is equivalent to the norm of the original  $f$ . Then picking  $g$  as the restriction of  $\mathbb{E}_{P_{\boldsymbol{\epsilon}}}[f^\boldsymbol{\epsilon}] \in \mathcal{H}_k$  to  $\mathcal{S} \subset \mathcal{X}$  leads to the conclusion.  $\square$

Proposition 4 implies that Theorem 2 is applicable whenever the execution noise is independent and identically distributed and  $k$  is translation-invariant, such

as the squared exponential and other popular kernels. However, in cases where the execution noise distribution changes significantly from target to target, algorithms such as uGP-UCB can yield better results.

## 5.2 Bounding the regret of uGP-UCB

In this section, we analyse the case when uGP-UCB has no access to location estimates  $P_t^L$  and uses instead  $\hat{P}_{\mathbf{x}_t}$  with the observations  $\mathcal{D}_n = \{\hat{P}_{\mathbf{x}_t}, y_t\}_{t=1}^n$ . We will firstly consider an ideal setting, where  $\hat{P}_{\mathbf{x}} = P_{\mathbf{x}}^E$ ,  $\forall \mathbf{x} \in \mathcal{S}$ , and then a non-ideal scenario. Recall that the regret bounds presented so far depend on the maximum information gain  $\gamma_n$ . As an analogy, in the case of uGP-UCB, given any  $\{P_t\}_{t=1}^n \subset \mathcal{P}$ , we have:

$$I(\mathbf{y}_n; \hat{\mathbf{f}}_n | \{P_t\}_{t=1}^n) = \frac{1}{2} \log |\mathbf{I} + \lambda^{-1} \hat{\mathbf{K}}_n|, \quad (18)$$

where  $[\hat{\mathbf{K}}_n]_{ij} = \hat{k}(P_i, P_j)$ ,  $i, j \in \{1, \dots, n\}$ . Let's assume an arbitrary set  $\mathcal{P}_s \subset \mathcal{P}$  containing either the query model or the estimated location distributions. As the set  $\mathcal{P}_s$  is not necessarily compact, a maximum for  $I(\mathbf{y}_n; \hat{\mathbf{f}}_n | \mathcal{R})$  may not correspond to a given set  $\mathcal{R} \subset \mathcal{P}_s$ . However, we can always define:

$$\hat{\gamma}_n(\mathcal{P}_s) := \sup_{\mathcal{R} \subset \mathcal{P}_s: |\mathcal{R}|=n} I(\mathbf{y}_n; \hat{\mathbf{f}}_n | \mathcal{R}), \quad (19)$$

The results presented next will use  $\hat{\gamma}_n^E := \hat{\gamma}_n(\mathcal{P}_E)$ , where  $\mathcal{P}_E \subset \mathcal{P}$  is the image of  $\mathcal{S}$  under the mapping  $\mathbf{x} \mapsto P_{\mathbf{x}}^E$ . Considering these definitions, the following bounds the uncertain-inputs regret of uGP-UCB.

**Theorem 5** (uGP-UCB regret). *Let  $\delta \in (0, 1)$ ,  $f \in \mathcal{H}_k$ , and  $b \geq \|f\|_k$ . Consider  $\zeta_t$  as  $\sigma_\zeta$ -sub-Gaussian noise. Assume that both  $k$  and  $P_{\mathbf{x}}^E$  satisfy the conditions for  $\Delta f_{P_{\mathbf{x}}^E}$  to be  $\sigma_E$ -sub-Gaussian, for a given  $\sigma_E > 0$ , for all  $t \geq 1$ . Then, running uGP-UCB with:*

$$\beta_t = b + \sigma_\nu \sqrt{2(I(\mathbf{y}_{t-1}; \hat{\mathbf{f}}_{t-1} | \{P_{\mathbf{x}_i}^E\}_{i=1}^{t-1}) + 1 + \log(1/\delta))}, \quad (20)$$

where  $\sigma_\nu := \sqrt{\sigma_E^2 + \sigma_\zeta^2}$ , the uncertain-inputs cumulative regret satisfies:

$$\hat{R}_n \in \mathcal{O} \left( \sqrt{n \hat{\gamma}_n^E} \left( b + \sqrt{\hat{\gamma}_n^E + \log(1/\delta)} \right) \right) \quad (21)$$

with probability at least  $1 - \delta$ .

*Proof sketch.* This theorem applies the fact that  $\hat{k}_E(\mathbf{x}, \mathbf{x}') := \hat{k}(P_{\mathbf{x}}^E, P_{\mathbf{x}'}^E)$ , for  $\mathbf{x}, \mathbf{x}' \in \mathcal{S}$ , defines a positive-definite kernel on  $\mathcal{S}$  (Steinwart and Christmann, 2008, Lem. 4.3). By Lemma 1, we have that exists a  $\hat{f} \in \mathcal{H}_{\hat{k}_E}$  with  $\hat{f}(P_{\mathbf{x}}^E) = \mathbb{E}[f(\tilde{\mathbf{x}})|\mathbf{x}]$ , for  $\tilde{\mathbf{x}}|\mathbf{x} \sim P_{\mathbf{x}}^E$ . Then it follows that  $g: \mathbf{x} \mapsto \hat{f}(P_{\mathbf{x}}^E)$  is in  $\mathcal{H}_{\hat{k}_E}$ . As  $\hat{\gamma}_n^E$  is the maximum information gain of a model  $\text{GP}(0, \hat{k}_E)$ , the rest follows similarly to Theorem 2.  $\square$

Theorem 5 states that uGP-UCB obtains similar bounds for the uncertain-inputs regret to those of IGP-UCB. However, notice that  $\hat{\gamma}_n^E$ , instead of  $\gamma_n$ , appears in Equation 21. The next result shows that  $\hat{\gamma}_n^E \leq \gamma_n$ , which means smaller regret bounds, in the i.i.d. execution noise case considered previously (Proposition 4).

**Proposition 6.** *Consider a compact set  $\mathcal{S} \subset \mathcal{X}$ , a distribution  $P_\epsilon \in \mathcal{P}$ , with  $\mathbb{E}_{P_\epsilon}[\epsilon] = 0$ , and a set:*

$$\mathcal{P}_\epsilon := \{P \in \mathcal{P} \mid \tilde{\mathbf{x}} = \hat{\mathbf{x}} + \epsilon, \hat{\mathbf{x}} \in \mathcal{S}, \epsilon \sim P_\epsilon, \tilde{\mathbf{x}} \sim P\}, \quad (22)$$

which is the set of location distributions with mean in  $\mathcal{S}$  and affected by i.i.d.  $P_\epsilon$ -noise. Assume that  $k: \mathcal{X} \times \mathcal{X} \rightarrow \mathbb{R}$  is translation invariant, and let  $\hat{k}: \mathcal{P} \times \mathcal{P} \rightarrow \mathbb{R}$  be defined according to Equation 9. Then we have that:

$$\forall n \geq 1, \quad \hat{\gamma}_n(\mathcal{P}_\epsilon) \leq \gamma_n, \quad (23)$$

where  $\hat{\gamma}_n$  is defined by Equation 19, and  $\gamma_n$  is the maximum information gain for  $\text{GP}(0, k)$ .

*Proof sketch.* One can prove that  $\mathbf{K}_n - \hat{\mathbf{K}}_n$  is positive definite for a  $\mathbf{K}_n$  built with  $\{\hat{\mathbf{x}}_t\}_{t=1}^n \subset \mathcal{S}$ . The information gain is a function of the determinant of these matrices, so that the inequality above follows.  $\square$

The result above indicates that the uncertain-inputs information gain shrinks as the input noise variance grows. While that might indicate that the optimisation problem becomes easier, if one recalls Equation 2, the constant  $\rho_E$  grows, making the problem harder.

What remains to verify is the effect of the approximation error between the model  $\hat{P}_{\mathbf{x}}$  and the actual  $P_{\mathbf{x}}^E$ . To minimise  $\hat{r}_t$ , using uGP-UCB with a model  $\hat{P}_{\mathbf{x}} \approx P_{\mathbf{x}}^E$  is worth if the approximation error  $\hat{\rho}_t := \max_{\mathbf{x} \in \mathcal{S}} |\mathbb{E}_{P_{\mathbf{x}}^E}[f] - \mathbb{E}_{\hat{P}_{\mathbf{x}}}[f]|$  is small. Ideally  $\hat{P}_{\mathbf{x}}$  should be an adaptive model  $\hat{P}_{\mathbf{x}}^t$  that can be learnt from past data in  $\mathcal{D}_{t-1}$  so that  $\hat{\rho}_t \rightarrow 0$  as  $t \rightarrow \infty$ . However, considering execution noise as marginally i.i.d. and Gaussian has been a popular approach when dealing with problems involving uncertain inputs (Mchutchon and Rasmussen, 2011; Nogueira et al., 2016). In this case, we provide an upper bound on  $\hat{\rho}_t$ .

**Proposition 7.** *Let  $\mathcal{X} = \mathbb{R}^d$ ,  $f \in \mathcal{H}_k$  and  $\|f\|_k \leq b$ . Assume that, for any  $\mathbf{x} \in \mathcal{S} \subset \mathcal{X}$ , the query distribution  $P_{\mathbf{x}}^E$  is Gaussian with mean  $\mathbf{x}$  and positive-definite covariance  $\Sigma^E$ . Then, using a Gaussian model  $\hat{P}_{\mathbf{x}}$  with same mean and a given constant positive-definite covariance matrix  $\hat{\Sigma}$ , we have that for any  $\mathbf{x} \in \mathcal{S}$ :*

$$\left| \mathbb{E}_{P_{\mathbf{x}}^E}[f] - \mathbb{E}_{\hat{P}_{\mathbf{x}}}[f] \right| \leq \frac{b}{2} \sqrt{\text{tr}(\hat{\Sigma}^{-1} \Sigma^E) - d + \log \frac{|\hat{\Sigma}|}{|\Sigma^E|}}.$$

*Proof sketch.* This result follows by applying Pinsker's inequality (Boucheron et al., 2013) to  $\hat{P}_{\mathbf{x}}$  and  $P_{\mathbf{x}}^E$ .  $\square$

## 6 Experiments

In this section, we present experimental results obtained in simulation with the proposed uGP-UCB algorithm comparing it against other Bayesian optimisation methods: IGP-UCB, with adapted noise model (as in Theorem 2), and the unscented expected improvement (UEI) heuristic (Nogueira et al., 2016), which applies the unscented transform to the expected improvement over a conventional GP model. Our aim in this section is to evaluate the performance of these methods in optimisation problems where both the sampling of the objective function and the location at which the sample is taken are significantly noisy.

### 6.1 Objective functions in the same RKHS

In this experiment, for each trial a different objective function  $f \in \mathcal{H}_k$  was generated, where  $k$  is the squared-exponential kernel with length-scale set to 0.1. The search space was set to the unit square  $\mathcal{S} = [0, 1]^2 \subset \mathbb{R}^2$ . Each  $f = \sum_{i=1}^m \alpha_i k(\cdot, \mathbf{x}_i)$  was generated by uniformly sampling  $\alpha_i \in [-1, 1]$  and support points  $\mathbf{x}_i \in \mathcal{S}$ , for  $i \in \{1, \dots, m\}$ , with  $m = 30$ . Observation noise was set as  $\zeta_t \sim N(0, \sigma_\zeta^2)$  with  $\sigma_\zeta = 0.1$ .

As parameters to verify the theoretical results for the UCB algorithms, we set  $\delta = 0.4$ , and computed  $b = \|f\|_k$  directly. The querying execution noise in  $P_{\mathbf{x}}^E$  was i.i.d. sampled from  $N(\mathbf{0}, \sigma_{\mathbf{x}}^2 \mathbf{I})$  with  $\sigma_{\mathbf{x}} = 0.1$ . The output noise parameters for the GP model were computed according to Proposition 3, with each method assuming execution noise coming from  $N(\mathbf{0}, \hat{\sigma}_{\mathbf{x}}^2 \mathbf{I})$ . To verify robustness to noise-misspecification, we tested  $\hat{\sigma}_{\mathbf{x}}$  set according to different ratios with respect to the true  $\sigma_{\mathbf{x}}$ . Noise on the localisation estimates  $P_t^L$  was set at half the standard deviation of the true execution noise. We directly computed the current information gain  $I(\mathbf{y}_t; \hat{\mathbf{f}}_t | \{P_i^L\}_{i=1}^t)$  to set  $\beta_t$ . For all methods, the GP covariance function was set as the RKHS kernel  $k$ .

**Results:** Figure 2 presents performance results, in terms of mean uncertain-inputs regret, i.e.  $\hat{r}_t^{\text{avg}} = \frac{1}{t} \sum_{i=1}^t \hat{r}_i$ . This performance metric is an upper bound on the simple regret, since  $\min_{i \leq t} \hat{r}_i \leq \hat{r}_t^{\text{avg}}$ , and allows verifying how close each method gets to the global optimum within  $t$  iterations. As the plots show, when the execution noise model is correct, with  $\hat{\sigma}_{\mathbf{x}} = \sigma_{\mathbf{x}}$ , uGP-UCB is able to outperform both IGP-UCB and UEI, while every method’s performance degrades under mismatch in the execution noise assumption. A larger than needed execution noise variance leads to a large  $\beta_t$  for the UCB methods, promoting exploration. Querying with a very noisy model  $\hat{P}_{\mathbf{x}}$  also excessively smoothes the GP prior and the acquisition function for uGP-UCB and UEI, respectively. Consequently, each

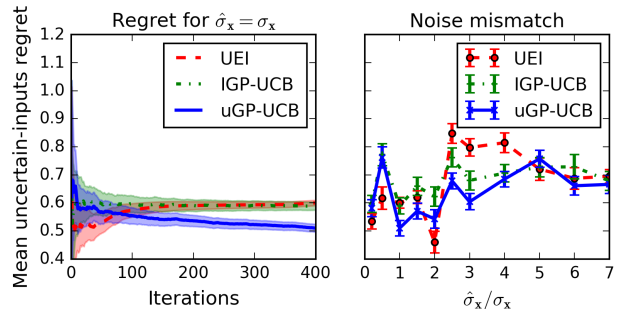

Figure 2: Optimisation of functions in the same RKHS. On the left, the UCB confidence-bound parameter  $\beta_t$  was set according to the theoretical results. The plot on the right shows the effect of execution noise model mismatch on each method’s regret after running for a total of 400 iterations. Results were averaged over 10 trials, and the shaded areas and error bars correspond to one standard deviation.

method’s model on  $f$  tends to a flat function, and none of them is able to make significant improvements after large mismatches, such as  $\hat{\sigma}_{\mathbf{x}} \geq 5\sigma_{\mathbf{x}}$ , as Figure 2 shows. Despite the loss of performance, uGP-UCB remains as a general lower bound in terms of regret, showing that the proposed method is relatively robust to the effects of mismatch in the execution noise model.

In practice, the convergence rate in Figure 2 can be improved by setting the UCB parameter  $\beta_t$  at a fixed low value. As the  $\mathcal{O}$  notation indicates, cumulative regret bounds are valid only up to a constant factor. Their main focus is on guaranteeing asymptotic convergence, i.e.  $\lim_{n \rightarrow \infty} \frac{\hat{R}_n}{n} = 0$ , as most theoretical results in the UCB literature (Srinivas et al., 2010; Chowdhury and Gopalan, 2017). To achieve no regret, the value of the UCB parameter  $\beta_t$  monotonically increases over iterations, ensuring that the search space is fully explored. The drawback, however, is that excessive exploration decreases performance in the short term. In the next section, we present results where  $\beta_t$  is fixed.

### 6.2 Objective function in different RKHS

To verify uGP-UCB’s performance under incorrect kernel assumptions, the next experiment performed tests with an objective function in a space not matching the GP squared-exponential kernel’s RKHS. In particular, we chose the 4-dimensional Michalewicz function, which is a classic benchmark function for global optimisation algorithms (Vanaret et al., 2014), over the domain  $\mathcal{S} = [0, \pi]^4$ .

Figure 3 presents performance results for fixed  $\beta_t = 3$  and a comparison of each algorithm’s sensitivity to the

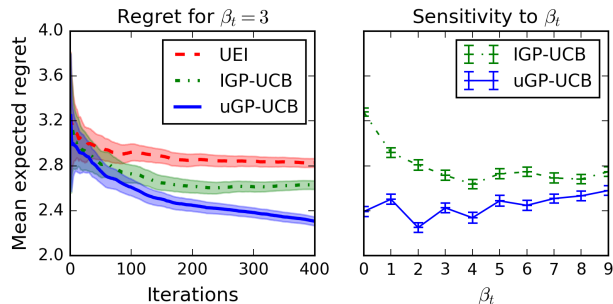

Figure 3: Optimisation of the Michalewicz function. The plot on the left presents the mean expected regret observed for each algorithm with  $\beta_t = 3$  for UCB methods. On the right, we see how different settings for  $\beta_t$  affect each UCB method’s mean expected regret after 300 iterations. Results were averaged over 10 (left) and 5 (right) trials with shaded areas and error bars corresponding to two standard deviations.

choice of this UCB parameter. Input noise was set to  $\sigma_{\mathbf{x}} = 0.1$ , and output noise was absent. With  $\beta_t$  fixed across iterations, IGP-UCB served as a BO baseline not accounting for input noise. As the results show, uGP-UCB is able to outperform both baselines. In addition, uGP-UCB shows consistently better performance than IGP-UCB across varying settings for  $\beta_t$ . These results demonstrate that the uGP-UCB algorithm is able to perform well in situations where its modelling assumptions are not exactly met, such as in scenarios involving physical systems.

### 6.3 Robotic exploration problem

This section presents results obtained in a simulated robotic exploration problem. In this experiment, a robot is set to explore an environmental process. The underlying process is based on the Broom’s Barn dataset<sup>2</sup>, consisting of the log-concentration of potassium in the soil of an experimental agricultural area. The robot is allowed to perform up to 30 measurements on different locations. Each BO method sequentially selects the locations where the robot should make a measurement in the usual online decision making process, based on the observations it gets. To simulate the robot, an ATRV platform, we used the OpenRobots’ Morse simulator<sup>3</sup>. In this scenario, execution noise is not following a stationary distribution due to the dynamic constraints of the robot, imperfections in motion control, etc. We applied Gaussian noise to the pose information given by the simulator and used pure-pursuit path-following control to guide the robot to

<sup>2</sup>Available at <http://www.kriging.com/datasets/>

<sup>3</sup>Morse: <https://www.openrobots.org/morse>

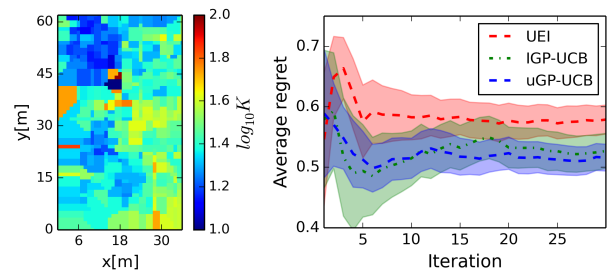

(a) Broom’s barn data (b) Robotics problem

Figure 4: Robotics exploration experiment: (a) presents the Broom’s barn data as distributed over the search space; and (b) shows the performance of each BO approach, averaged over 4 runs.

the target locations. Location estimates were provided by an extended Kalman filter (Thrun et al., 2006). Hyper-parameters for each GP were learnt online via log-marginal likelihood maximisation. The query noise model for uGP-UCB was set with  $\hat{\sigma}_{\mathbf{x}}^2 = 2$ . We set  $\beta_t$  at a fixed value, again with  $\beta_t = 3$ . Figure 4b presents the performance of each algorithm in terms of regret. The plots show that uGP-UCB is able to outperform UEI, while performing still better than IGP-UCB in the long run, and with less variance in the outcomes. This result confirms that it is possible to obtain better performance in practical BO problems by taking advantage of distribution estimates and by directly considering execution uncertainty.

## 7 Conclusion

In this paper we proposed a novel method to optimise functions where both the sampling of the function as well as the location at which the function is sampled are stochastic. We provided theoretical guarantees for BO algorithms in noisy-inputs settings. In experiments we demonstrated that the proposed uGP-UCB shows competitive performance when compared to other BO approaches to input noise. Our method can be applied to problems where input variates or an agent’s state is only partially observable, such as robotics, policy search, stochastic simulations, and others. For future work, it is worth investigating online-learning techniques for the approximate querying distribution  $\hat{P}_{\mathbf{x}}$  and other bounds for the uncertain-inputs GP information gain.

### Acknowledgements

We would like to thank the reviewers and Dr. Vitor Guizilini for helpful discussions and the funding agencies CAPES, Brazil, and Data61/CSIRO, Australia.



## A Appendix

This section presents proofs for auxiliary theoretical results in the main paper. The section starts by presenting some common definitions and lemmas applied by the proofs. More specific background for a given proof, when necessary, will be presented in the section containing the proof itself. Each subsection then presents a proof for each result. In the end, we also present the formulation of the uncertain-inputs squared-exponential kernel (Section A.8) used in experiments. For reference, a notation summary is presented in Table 1.

The main theorems in this paper are based on the following result by Chowdhury and Gopalan (2017), restated here for convenience.

**Theorem 8** (Chowdhury and Gopalan (2017, Theorem 3)). *Let  $\delta \in (0, 1)$ ,  $\|f\|_k \leq b$ , and  $\nu_t$  be conditionally  $\sigma_\nu$ -sub-Gaussian noise. Then, running IGP-UCB with  $\beta_t = b + \sigma_\nu \sqrt{2(\gamma_{t-1} + 1 + \log(1/\delta))}$  for  $f \in \mathcal{H}_k(\mathcal{S})$ , and a compact  $\mathcal{S} \subset \mathbb{R}^d$ , the cumulative regret of the algorithm is bounded by  $\mathcal{O}(\sqrt{n}(b\sqrt{\gamma_n} + \gamma_n))$  with high probability. Specifically, we have that:*

$$\mathbb{P}\left\{R_n \in \mathcal{O}\left(b\sqrt{n\gamma_n} + \sqrt{n(\gamma_n + \log(1/\delta))}\right)\right\} \geq 1 - \delta. \quad (24)$$

The following are common definitions and known theoretical results applied by different proofs.

**Definition 9.** *For a given  $\sigma_\xi > 0$ , a real-valued random variable  $\xi$  is said to be  $\sigma_\xi$ -sub-Gaussian if:*

$$\forall \lambda \in \mathbb{R}, \mathbb{E}[e^{\lambda\xi}] \leq e^{\lambda^2\sigma_\xi^2/2}. \quad (25)$$

**Definition 10** (Bounded linear operator). *A linear operator  $\mathbf{L} : \mathcal{X} \rightarrow \mathcal{Y}$  mapping a vector space  $\mathcal{X}$  to a vector space  $\mathcal{Y}$ , both over the same field, is any operator such that, for all  $x, x' \in \mathcal{X}$  and any scalar  $\alpha$ :*

$$\mathbf{A1.} \quad \mathbf{L}(x + x') = \mathbf{L}x + \mathbf{L}x'$$

$$\mathbf{A2.} \quad \mathbf{L}(\alpha x) = \alpha \mathbf{L}x$$

*If  $\mathcal{X}$  and  $\mathcal{Y}$  are normed vector spaces, the operator  $\mathbf{L}$  is bounded if there is a constant  $c \in \mathbb{R}$  such that:*

$$\forall x \in \mathcal{X}, \quad \|\mathbf{L}x\|_{\mathcal{Y}} \leq c\|x\|_{\mathcal{X}}. \quad (26)$$

*The smallest  $c$  satisfying the above is called the norm of the operator  $\mathbf{L}$ , denoted by  $\|\mathbf{L}\|$ .*

**Lemma 11** (Bounded linear extension theorem (Kreyszig, 1978, Thr. 2.7-11)). *Let  $\mathbf{M} : \mathcal{W} \rightarrow \mathcal{Y}$  be a bounded linear operator, where  $\mathcal{W}$  lies in a normed vector space  $\mathcal{X}$ , and  $\mathcal{Y}$  is a Banach space. Then  $\mathbf{M}$  has an extension  $\bar{\mathbf{M}} : \bar{\mathcal{W}} \rightarrow \mathcal{Y}$ , where  $\bar{\mathcal{W}}$  is a bounded linear operator with norm  $\|\bar{\mathbf{M}}\| = \|\mathbf{M}\|$ , and  $\bar{\mathcal{W}}$  denotes the closure of  $\mathcal{W}$  in  $\mathcal{X}$ .*

Table 1: Notation

|                              |                                                                                |
|------------------------------|--------------------------------------------------------------------------------|
| $\mathbb{R}$                 | the field of real numbers, or the real line                                    |
| $\mathbb{R}^d$               | the Euclidean vector space of dimension $d$                                    |
| $\mathcal{X}$                | domain of BO's objective function                                              |
| $\mathcal{S}$                | BO's search space, a subset of $\mathcal{X}$                                   |
| $\mathcal{P}$                | set of all probability measures on $\mathcal{X}$                               |
| $\mathbf{x}$                 | a location vector, $\mathbf{x} \in \mathbb{R}^d$                               |
| $\tilde{\mathbf{x}}$         | an $\mathbb{R}^d$ -valued random variable                                      |
| $f$                          | deterministic-inputs function                                                  |
| $\hat{f}$                    | uncertain-inputs function, i.e. $\hat{f} : \mathcal{P} \rightarrow \mathbb{R}$ |
| $P$                          | a probability measure or distribution                                          |
| $P_t^L$                      | location distribution informed after query                                     |
| $P_{\mathbf{x}}^E$           | query location distribution given target $\mathbf{x}$                          |
| $\hat{P}_{\mathbf{x}}$       | model for $P_{\mathbf{x}}^E$ used by uGP-UCB                                   |
| $\psi_P$                     | kernel mean embedding of $P$                                                   |
| $k$                          | a positive-definite kernel                                                     |
| $\mathcal{H}_k$              | the RKHS of $k$                                                                |
| $\mathcal{H}_k(\mathcal{S})$ | restriction of $\mathcal{H}_k$ to a subdomain $\mathcal{S}$                    |
| $\mathcal{H}_k^0$            | the pre-Hilbert space defined by $k$                                           |
| $\bar{\mathcal{H}}_k^0$      | the closure of the pre-RKHS $\mathcal{H}_k^0$ in $\mathcal{H}_k$               |

### A.1 Proof of Lemma 1

**Lemma 1** (Expected function). *Any  $f \in \mathcal{H}_k$  is continuously mapped to a corresponding  $\hat{f} \in \mathcal{H}_{\hat{k}}$ , which is such that:*

$$\forall P \in \mathcal{P}, \quad \hat{f}(P) = \mathbb{E}_P[f] \quad (10)$$

$$\|\hat{f}\|_{\hat{k}} = \|f\|_k.$$

*The mapping  $f \mapsto \hat{f}$  constitutes an isometric isomorphism between  $\mathcal{H}_k$  and  $\mathcal{H}_{\hat{k}}$ .*

*Proof.* Lemma 1 basically follows from the presence of Dirac measures in  $\mathcal{P}$ , which allow transforming point evaluations into expectations. For the proof, we will first derive a bounded linear operator  $\mathbf{M} : \mathcal{H}_k \rightarrow \mathcal{H}_{\hat{k}}$  satisfying the conditions in Equation 10. From Definition 10, it is not hard to see that any bounded linear operator is also continuous (see Kreyszig, 1978, Thr. 2.7-9). The isometric relationship between  $\mathcal{H}_k$  and  $\mathcal{H}_{\hat{k}}$  depends on the existence of a bijective isometry between the two Hilbert spaces. We will prove that by showing that  $\mathbf{M}$ , which is an isometry, has an inverse  $\mathbf{M}^{-1} : \mathcal{H}_{\hat{k}} \rightarrow \mathcal{H}_k$ .

To facilitate the analysis, we start by working with the pre-RKHS associated with  $k$ , which is defined as:

$$\mathcal{H}_k^0 := \text{span}\{k(\cdot, \mathbf{x}) \mid \mathbf{x} \in \mathcal{X}\}, \quad (27)$$

where span denotes the linear span, i.e.  $\mathcal{H}_k^0$  is the set of all linear combinations of the vectors  $k(\cdot, \mathbf{x})$ ,  $\mathbf{x} \in \mathcal{X}$ . Since  $\mathcal{H}_k^0$  is dense in  $\mathcal{H}_k$  (Steinwart and Christmann, 2008, Thr. 4.21), any bounded linear map defined on  $\mathcal{H}_k^0$  can be extended to the full  $\mathcal{H}_k$  by Lemma 11.

Given any  $f = \sum_{i=1}^m \alpha_i k(\cdot, \mathbf{x}_i) \in \mathcal{H}_k^0$ , define the map  $\mathbf{M}_0 : \mathcal{H}_k^0 \rightarrow \mathcal{H}_{\hat{k}}$  by:

$$\mathbf{M}_0 f = \sum_{i=1}^m \alpha_i \hat{k}(\cdot, D_{\mathbf{x}_i}) \in \mathcal{H}_{\hat{k}}, \quad (28)$$

where  $D_{\mathbf{x}} \in \mathcal{P}$  is the Dirac measure centred on  $\mathbf{x}$ . From the definition of  $\psi$  in Equation 7, note that  $k(\cdot, \mathbf{x}) = \psi_{D_{\mathbf{x}}}$  for any  $\mathbf{x} \in \mathcal{X}$ . With this property and the definition of  $\hat{k}$  (Equation 9), for any  $f \in \mathcal{H}_k^0$ , we have that:

$$\begin{aligned} \forall P \in \mathcal{P}, \quad \mathbf{M}_0 f(P) &= \sum_{i=1}^m \alpha_i \hat{k}(P, D_{\mathbf{x}_i}) \\ &= \sum_{i=1}^m \alpha_i \langle \psi_P, k(\cdot, \mathbf{x}_i) \rangle_k \\ &= \langle f, \psi_P \rangle_k = \mathbb{E}_P[f] \end{aligned} \quad (29)$$

Linearity follows, since, for any  $f, g \in \mathcal{H}_k^0$ :

$$\begin{aligned} \mathbf{M}_0(f+g)(P) &= \mathbb{E}_P[f+g] \\ &= \mathbb{E}_P[f] + \mathbb{E}_P[g] \\ &= \mathbf{M}_0 f(P) + \mathbf{M}_0 g(P), \quad \forall P \in \mathcal{P}, \end{aligned} \quad (30)$$

and, for any  $\alpha \in \mathbb{R}$ :

$$\begin{aligned} \mathbf{M}_0(\alpha f)(P) &= \mathbb{E}_P[\alpha f] \\ &= \alpha \mathbb{E}_P[f] \\ &= \alpha \mathbf{M}_0 f(P), \quad \forall P \in \mathcal{P}. \end{aligned} \quad (31)$$

Furthermore, for any  $f := \sum_{i=1}^m \alpha_i k(\cdot, \mathbf{x}_i) \in \mathcal{H}_k^0$ , the RKHS norm of  $\hat{f} = \mathbf{M}_0 f$  is such that:

$$\begin{aligned} \|\hat{f}\|_{\hat{k}}^2 &= \sum_{i=1}^m \sum_{j=1}^m \alpha_i \alpha_j \hat{k}(D_{\mathbf{x}_i}, D_{\mathbf{x}_j}) \\ &= \sum_{i=1}^m \sum_{j=1}^m \alpha_i \alpha_j k(\mathbf{x}_i, \mathbf{x}_j) = \|f\|_k^2. \end{aligned} \quad (32)$$

Therefore,  $\mathbf{M}_0$  represents a bounded linear operator. Applying Lemma 11 to  $\mathbf{M}_0$  yields the first statement in Lemma 1. For the remaining steps, let  $\mathbf{M} := \overline{\mathbf{M}_0}$ .

For  $\mathcal{H}_{\hat{k}}$  to be isometric to  $\mathcal{H}_k$ , the mapping by  $\mathbf{M}$  needs to be invertible. As a bounded linear operator between Hilbert spaces,  $\mathbf{M}$  has a unique adjoint  $\mathbf{M}^* : \mathcal{H}_{\hat{k}} \rightarrow \mathcal{H}_k$  with  $\|\mathbf{M}^*\| = \|\mathbf{M}\|$  (Kreyszig, 1978, Thm. 3.9-2). In our case,  $\mathbf{M}^*$  is such that, given any  $\hat{f} \in \mathcal{H}_{\hat{k}}$ :

$$\begin{aligned} \hat{f}(P) &= \langle \hat{f}, \hat{k}(\cdot, P) \rangle_{\hat{k}} \\ &= \langle \hat{f}, \mathbf{M} \psi_P \rangle_{\hat{k}} \\ &= \langle \mathbf{M}^* \hat{f}, \psi_P \rangle_k \\ &= \mathbb{E}_P[\mathbf{M}^* \hat{f}], \quad \forall P \in \mathcal{P}. \end{aligned} \quad (33)$$

Setting  $\hat{f} := \mathbf{M}f$ , for  $f \in \mathcal{H}_k$ , in the equation above, we see that  $\mathbb{E}_P[f] = \mathbf{M}f(P) = \mathbb{E}[\mathbf{M}^* \mathbf{M}f]$ , so that  $\mathbf{M}^* = \mathbf{M}^{-1}$ , which concludes the proof.  $\square$

## A.2 Proof of Theorem 2

**Theorem 2** (IGP-UCB uncertain-inputs regret). *For any  $f \in \mathcal{H}_k$ , assume that:*

1. *the mapping  $\mathbf{x} \mapsto \mathbb{E}_{P_{\mathbf{x}}^E}[f]$  defines a function  $g \in \mathcal{H}_k(\mathcal{S})$  and  $\|g\|_k \leq b$ ;*
2.  *$\forall \mathbf{x} \in \mathcal{S}, \Delta f_{P_{\mathbf{x}}^E} := f(\tilde{\mathbf{x}}^E) - \mathbb{E}_{P_{\mathbf{x}}^E}[f]$  is  $\sigma_E$ -sub-Gaussian, for a given  $\sigma_E > 0$ , where  $\tilde{\mathbf{x}}^E \sim P_{\mathbf{x}}^E$ ;*
3. *and  $\zeta_t$  is conditionally  $\sigma_\zeta$ -sub-Gaussian.*

*Then running IGP-UCB with  $\sigma_\nu := \sqrt{\sigma_E^2 + \sigma_\zeta^2}$  and  $\beta_t := b + \sigma_\nu \sqrt{2(\gamma_{t-1} + 1 + \log(1/\delta))}$  leads to the same bounds as Theorem 3 in Chowdhury and Gopalan (2017) for the uncertain-inputs cumulative regret of the algorithm. Namely, we have that:*

$$\mathbb{P} \left\{ \hat{R}_n \in \mathcal{O} \left( b\sqrt{n\gamma_n} + \sigma_\nu \sqrt{n(\gamma_n + \log(1/\delta))} \right) \right\} \geq 1 - \delta. \quad (17)$$

*Proof.* Theorem 2 establishes sufficient conditions for Theorem 8 to be applicable to the noisy-inputs settings. The observation noise, as perceived by the GP model, is  $\nu_t := y_t - g(\mathbf{x}_t)$ , where  $g$  follows the definition in item 1 and  $\mathbf{x}_t$  is the location selected by IGP-UCB according to the setting for  $\beta_t$  in Theorem 2. Observations  $y_t$  are taken at  $\tilde{\mathbf{x}}_t^E \sim P_{\mathbf{x}_t}^E$ , instead, yielding:

$$\nu_t = y_t - g(\mathbf{x}_t) = \zeta_t + f(\tilde{\mathbf{x}}_t^E) - \mathbb{E}_{P_{\mathbf{x}_t}^E}[f] = \zeta_t + \Delta f_{P_{\mathbf{x}_t}^E}. \quad (34)$$

Given that  $\mathbf{x}_t$  is  $\mathfrak{F}_{t-1}$ -measurable, as it is predictable given  $\{\mathbf{x}_i, \nu_i\}_{i=1}^{t-1}$ , we have that  $\Delta f_{P_{\mathbf{x}_t}^E}$  is  $\sigma_F$ -sub-Gaussian when conditioned on  $\mathfrak{F}_{t-1}$ . By assumption 3,  $\zeta_t$  is conditionally sub-Gaussian. Since  $\zeta_t$  and  $\Delta f_{P_{\mathbf{x}_t}^E}$  are independent given  $\mathfrak{F}_{t-1}$ , we have that:

$$\begin{aligned} \mathbb{E}[\exp(\lambda \nu_t) | \mathfrak{F}_{t-1}] &= \mathbb{E} \left[ \exp \left( \lambda \left( \zeta_t + \Delta f_{P_{\mathbf{x}_t}^E} \right) \right) \middle| \mathfrak{F}_{t-1} \right] \\ &= \mathbb{E} \left[ \exp(\lambda \zeta_t) \exp \left( \lambda \Delta f_{P_{\mathbf{x}_t}^E} \right) \middle| \mathfrak{F}_{t-1} \right] \\ &\leq e^{\lambda^2 \sigma_\zeta^2 / 2} e^{\lambda^2 \sigma_F^2 / 2} \\ &= e^{\lambda^2 (\sigma_\zeta^2 + \sigma_F^2) / 2} \\ &= e^{\lambda^2 \sigma_\nu^2 / 2} \text{ (a.s.)}, \quad \forall \lambda \in \mathbb{R}, \end{aligned} \quad (35)$$

so that  $\nu_t$  is conditionally  $\sigma_\nu$ -sub-Gaussian.

Assumption 1 states that  $g \in \mathcal{H}_k(\mathcal{S})$ , meeting the remaining requirement for Theorem 8. Therefore, running IGP-UCB with  $\sigma_\nu$  and  $b \geq \|g\|_k$ , following the settings in Theorem 8, leads to cumulative regret bounds for  $g$  as in Equation 24. From the definition in

Equation 4, the cumulative regret  $R_n$  for  $g$  is equivalent to the uncertain-inputs cumulative regret  $\hat{R}_n$  for  $f$ , which leads to the conclusion in Theorem 2.  $\square$

### A.3 Proof of Proposition 3

To prove Proposition 3, we will make use of the following theoretical background.

**Definition 12** (Bounded differences property). *Let  $\mathbf{x} = [x_1, \dots, x_d]^\top$  and:*

$$\mathbf{x}'_i = [x_1, \dots, x_{i-1}, x'_i, x_{i+1}, \dots, x_d]^\top, \quad (36)$$

where  $x_i, x'_i \in \mathcal{X}_i \subset \mathbb{R}$  and  $\mathcal{X} = (\mathcal{X}_1 \times \dots \times \mathcal{X}_d)$ . A function  $f : \mathcal{X} \rightarrow \mathbb{R}$  has the bounded differences property if:

$$|f(\mathbf{x}) - f(\mathbf{x}'_i)| \leq c_i, \quad \forall i \in \{1, \dots, d\}, \quad (37)$$

where  $c_i$  are non-negative constants.

**Lemma 13** (Corollary 4.36 in Steinwart and Christmann (2008)). *Let  $f \in \mathcal{H}_k$ , where  $k : \mathcal{X} \times \mathcal{X} \rightarrow \mathbb{R}$  is a twice-differentiable kernel on  $\mathcal{X} \subseteq \mathbb{R}^d$ . Then  $f$  has bounded first-order partial derivatives, such that for any  $\mathbf{x} \in \mathcal{X}$  and  $i \in \{1, \dots, d\}$ :*

$$\left| \frac{\partial f(\mathbf{x})}{\partial x_i} \right| \leq \|f\|_k \sqrt{\left. \frac{\partial^2 k(\mathbf{x}, \mathbf{x}')}{\partial x_i \partial x'_i} \right|_{\mathbf{x}'=\mathbf{x}}}. \quad (38)$$

**Lemma 14** (Theorem 5.5 in Boucheron et al. (2013)). *Let  $\tilde{\mathbf{x}} \sim N(\mathbf{0}, \mathbf{I})$  be an  $\mathbb{R}^d$ -valued standard Gaussian random vector. Let  $f : \mathbb{R}^d \rightarrow \mathbb{R}$  denote a  $\ell$ -Lipschitz function, i.e.:*

$$|f(\mathbf{x}) - f(\mathbf{x}')| \leq \ell \|\mathbf{x} - \mathbf{x}'\|_2, \quad \forall \mathbf{x}, \mathbf{x}' \in \mathbb{R}^d. \quad (39)$$

Then, for all  $\lambda \in \mathbb{R}$ :

$$\mathbb{E}[e^{\lambda(f(\tilde{\mathbf{x}}) - \mathbb{E}[f(\tilde{\mathbf{x}})])}] \leq e^{\frac{1}{2}\lambda^2\ell^2}. \quad (40)$$

Now we can proceed to the proof of Proposition 3, which is restated below.

**Proposition 3.** *Let  $k : \mathbb{R}^d \times \mathbb{R}^d \rightarrow \mathbb{R}$  be an at least twice-differentiable positive-definite kernel with finite  $\ell_k^2 \geq \sup_{\mathbf{x} \in \mathbb{R}^d} \sup_{i \in [d]} \left. \frac{\partial^2 k(\mathbf{x}, \mathbf{x}')}{\partial x_i \partial x'_i} \right|_{\mathbf{x}=\mathbf{x}'}$ . Then, for  $P \in \mathcal{P}$  and  $\tilde{\mathbf{x}} \sim P$ , we have that  $\Delta f_P := f(\tilde{\mathbf{x}}) - \mathbb{E}_P[f(\tilde{\mathbf{x}})]$  is  $\sigma_F$ -sub-Gaussian with:*

1.  $\sigma_F = \|f\|_k \ell_k \text{tr}(\Sigma)^{1/2}$ , if  $P$  is Gaussian with covariance matrix  $\Sigma$ ;
2.  $\sigma_F = \frac{1}{2} \|f\|_k \ell_k \sqrt{\sum_{i=1}^d \sigma_i^2}$ , if  $P$  has compact support, with  $|\tilde{x}_i - \hat{x}_i| \leq \frac{1}{2}\sigma_i$  for each coordinate  $i$ , where  $\hat{\mathbf{x}} = \mathbb{E}_P[\tilde{\mathbf{x}}]$ .

*Proof.* The following proof is split in two parts. The derivation firstly covers the case where the inputs follow a Gaussian distribution and then the case for arbitrary probability distributions with compact support.

**(1) Gaussian inputs:** In the case of Gaussian inputs, Proposition 3 is a direct consequence of Lemma 14 when applied to functions  $f \in \mathcal{H}_k$ . Notice that, by the definition of  $\mathcal{H}_k$ , any  $f$  in it is continuously differentiable and Lipschitz continuous according to Lemma 13. All we have to do is to generalise the inequality in Equation 40 for the case of general Gaussian random vectors  $\tilde{\mathbf{x}} \sim N(\hat{\mathbf{x}}, \Sigma)$ .

If  $\tilde{\mathbf{x}}^s$  is a standard Gaussian random vector, we can decompose  $\tilde{\mathbf{x}} = \hat{\mathbf{x}} + \mathbf{A}\tilde{\mathbf{x}}^s$ , where  $\Sigma = \mathbf{A}\mathbf{A}^\top$ , due to the translational and rotational invariance of Gaussian random vectors. We can define a function  $g$ , such that:

$$g(\tilde{\mathbf{x}}^s) = f(\hat{\mathbf{x}} + \mathbf{A}\tilde{\mathbf{x}}^s) = f(\tilde{\mathbf{x}}). \quad (41)$$

Since  $f$  is Lipschitz continuous,  $g$  also is, for some Lipschitz constant  $\ell_g$ . Then we can apply Lemma 14 to  $g$ , which yields:

$$\mathbb{E} \left[ e^{\lambda(g(\tilde{\mathbf{x}}^s) - \mathbb{E}[g(\tilde{\mathbf{x}}^s)])} \right] \leq e^{\frac{1}{2}\lambda^2\ell_g^2}. \quad (42)$$

In addition, by definition (Equation 41),  $g(\tilde{\mathbf{x}}^s)$  and  $f(\tilde{\mathbf{x}})$  follow the same distribution, so that  $\mathbb{E}[f(\tilde{\mathbf{x}})] = \mathbb{E}[g(\tilde{\mathbf{x}}^s)]$ . As a result,  $\Delta f_P = f(\tilde{\mathbf{x}}) - \mathbb{E}[f(\tilde{\mathbf{x}})]$  is  $\ell_g$ -sub-Gaussian, according to Definition 9.

Now  $\ell_g$  is any constant uniformly upper-bounding the Euclidean norm of  $g$ 's gradient, and:

$$\begin{aligned} \|\nabla g\|_2^2 &= \|\mathbf{A}^\top \nabla f\|_2^2 \\ &= \nabla f^\top \mathbf{A} \mathbf{A}^\top \nabla f \\ &= \nabla f^\top \Sigma \nabla f \end{aligned} \quad (43)$$

Without loss of generality, let's assume that  $\Sigma$  is a matrix of diagonal entries  $\sigma_i^2, 1 \leq i \leq d$ . Then we have that:

$$\|\nabla g\|_2^2 = \sum_{i=1}^d \sigma_i^2 \left| \frac{\partial f}{\partial x_i} \right|^2 \leq \ell_f^2 \text{tr}(\Sigma), \quad (44)$$

where  $\ell_f = \|f\|_k \ell_k$ . Therefore, the inequality in Equation 42 holds for  $\ell_g = \ell_f \sqrt{\text{tr}(\Sigma)}$ .

For a non-diagonal  $\Sigma$ , by spectral decomposition, we have that  $\Sigma = \mathbf{V}\mathbf{\Lambda}\mathbf{V}^\top$ , where  $\mathbf{\Lambda}$  is a diagonal matrix composed of  $\Sigma$ 's eigenvalues and  $\mathbf{V}\mathbf{V}^\top = \mathbf{I}$ . Observe that the result in Equation 44 would also hold for a zero-mean Gaussian random vector  $\tilde{\mathbf{x}}^v$  with covariance matrix  $\mathbf{\Lambda}$ . Then we could define  $h(\tilde{\mathbf{x}}^v) = f(\hat{\mathbf{x}} + \mathbf{V}\tilde{\mathbf{x}}^v)$  and follow similar steps to the ones we took for  $g$ . However,  $f$  and  $h$ , as defined, have the same Lipschitz constant, since:

$$\|\mathbf{V}\mathbf{x} - \mathbf{V}\mathbf{x}'\|_2^2 = (\mathbf{x} - \mathbf{x}')^\top \mathbf{V}^\top \mathbf{V} (\mathbf{x} - \mathbf{x}') = \|\mathbf{x} - \mathbf{x}'\|_2^2, \quad (45)$$

where we applied  $\mathbf{V}^\top \mathbf{V} = \mathbf{V}\mathbf{V}^\top = \mathbf{I}$ . In addition, as  $\Sigma$  is positive definite,  $\text{tr}(\Sigma) = \text{tr}(\mathbf{\Lambda})$ . Therefore,

the same result in Equation 44 holds for general  $\Sigma$  and  $\hat{\mathbf{x}}$ , which can also be seen as a consequence of the translational and rotational invariance of Gaussian random vectors. Making  $\sigma_F = \ell_g = \|f\|_k \ell_k \text{tr}(\Sigma)^{1/2}$  concludes the first part of the proof.

**(2) Distributions with compact support:** By Lemma 13, we can observe that  $f \in \mathcal{H}_k$  is Lipschitz continuous with respect to the 1-norm on  $\mathbb{R}^d$ , in particular:

$$|f(\mathbf{x}) - f(\mathbf{x}')| \leq \|f\|_k \ell_k \|\mathbf{x} - \mathbf{x}'\|_1, \quad \forall \mathbf{x}, \mathbf{x}' \in \mathbb{R}^d, \quad (46)$$

where  $\ell_k \geq 0$  is any constant such that  $\ell_k^2 \geq \sup_{\mathbf{x} \in \mathcal{X}} \sup_{i \in [d]} \frac{\partial^2 k(\mathbf{x}, \mathbf{x}')}{\partial x_i \partial x'_i} \Big|_{\mathbf{x}=\mathbf{x}'}$ . Therefore, according to Definition 12,  $f$  satisfies the bounded differences property for any  $\mathbf{x}$  in the support of  $P$  with  $c_i = \|f\|_k \ell_k \sigma_i$ . Applying McDiarmid's inequality (McDiarmid, 1989), we have that:

$$\mathbb{P}\{|f(\tilde{\mathbf{x}}) - \mathbb{E}_P(f)| \geq t\} \leq 2 \exp\left(-\frac{2t^2}{\|f\|_k^2 \ell_k^2 \sum_{i=1}^d \sigma_i^2}\right). \quad (47)$$

As a result,  $\Delta f_P$  is  $\sigma_F$ -sub-Gaussian with  $\sigma_F = \frac{1}{2} \|f\|_k \ell_k \sqrt{\sum_{i=1}^d \sigma_i^2}$ , according to Definition 9 and Lemma 2.2 in Boucheron et al. (2013). This concludes the proof.  $\square$

#### A.4 Proof of Proposition 4

**Proposition 4.** *Let  $\mathbf{x} \mapsto P_{\mathbf{x}}$  be a mapping such that, for any  $\mathbf{x} \in \mathcal{S} \subset \mathcal{X}$ ,  $\tilde{\mathbf{x}} \sim P_{\mathbf{x}} \in \mathcal{P}$  is decomposable as  $\tilde{\mathbf{x}} = \mathbf{x} + \epsilon$ , where  $\epsilon$  is independent and identically distributed, i.e.  $\epsilon \sim P_{\epsilon} \in \mathcal{P}$ . Assume that  $k$  is translation invariant. Then we have that, for any  $f \in \mathcal{H}_k$ , the mapping  $\mathbf{x} \mapsto \mathbb{E}_{P_{\mathbf{x}}}[f]$  defines a function  $g \in \mathcal{H}_k(\mathcal{S})$ , and  $\|g\|_k \leq \|f\|_k$ .*

*Proof.* To prove this result, we will consider properties of the inner product in  $\mathcal{H}_k$  when  $k$  is translation invariant. These properties essentially allow us to transfer the noise in the evaluation of  $f$  to  $f$  itself and then represent  $g$  as the expectation of this noisy version of  $f$ . Similar to the proof of Lemma 1, we start by defining an operator on  $\mathcal{H}_k^0$  (see Equation 27) and then extend it to  $\mathcal{H}_k$  by Lemma 11.

To develop the proof, we need to represent  $f$  in terms of the kernel  $k$ . Let  $f = \sum_{i=1}^m \alpha_i k(\cdot, \mathbf{x}_i) \in \mathcal{H}_k^0$ , which is the pre-Hilbert space of  $k$ . Considering the evaluation of the expected value of  $f$ , we have that:

$$\begin{aligned} \forall \mathbf{x} \in \mathcal{S}, \mathbb{E}_{P_{\mathbf{x}}}[f] &= \mathbb{E}_{\epsilon \sim P_{\epsilon}}[f(\mathbf{x} + \epsilon)] \\ &= \mathbb{E}_{\epsilon \sim P_{\epsilon}} \left[ \sum_{i=1}^m \alpha_i k(\mathbf{x} + \epsilon, \mathbf{x}_i) \right]. \end{aligned} \quad (48)$$

For a fixed  $\epsilon \in \mathbb{R}^d$ , we have that  $k(\mathbf{x} + \epsilon, \mathbf{x}') = k(\mathbf{x}, \mathbf{x}' - \epsilon)$ ,  $\forall \mathbf{x}, \mathbf{x}' \in \mathcal{X}$ , by translation invariance. Applying this property, we obtain:

$$\begin{aligned} f(\mathbf{x} + \epsilon) &= \sum_{i=1}^m \alpha_i k(\mathbf{x} + \epsilon, \mathbf{x}_i) \\ &= \sum_{i=1}^m \alpha_i k(\mathbf{x}, \mathbf{x}_i - \epsilon) \\ &= \left\langle \sum_{i=1}^m \alpha_i k(\cdot, \mathbf{x}_i - \epsilon), k(\cdot, \mathbf{x}) \right\rangle_k \\ &= f^{\epsilon}(\mathbf{x}) \end{aligned} \quad (49)$$

where  $f^{\epsilon} := \sum_{i=1}^m \alpha_i k(\cdot, \mathbf{x}_i - \epsilon)$  is equivalent to a version of  $f$  with inputs shifted by  $\epsilon$ . As the shift  $\epsilon$  is the same for all  $\mathbf{x}_i$ ,  $i \in \{1, \dots, m\}$ , the norm is unaffected:

$$\begin{aligned} \|f^{\epsilon}\|_k^2 &= \langle f^{\epsilon}, f^{\epsilon} \rangle_k = \sum_{i=1}^m \sum_{j=1}^m \alpha_i \alpha_j k(\mathbf{x}_i - \epsilon, \mathbf{x}_j - \epsilon) \\ &= \sum_{i=1}^m \sum_{j=1}^m \alpha_i \alpha_j k(\mathbf{x}_i, \mathbf{x}_j) \\ &= \langle f, f \rangle_k = \|f\|_k^2, \end{aligned} \quad (50)$$

where the second equality follows by translational invariance. Defining the mapping  $f \mapsto f^{\epsilon}$  as an operator from  $\mathcal{H}_k^0$  to  $\mathcal{H}_k$ , one can easily show that this operator is linear and bounded. Applying Lemma 11, then we have that  $f \mapsto f^{\epsilon}$  is actually well defined over the entire  $\mathcal{H}_k^0 = \mathcal{H}_k$ .

Now we can return to the derivation in Equation 48. Since  $k$  is measurable, we have that  $\epsilon \mapsto f^{\epsilon}$  defines a  $\mathcal{H}_k$ -valued random variable (Berliner and Thomas-Agnan, 2004, Ch. 4). In addition, as  $\|f\|_k$  is finite,  $\epsilon \mapsto \|f^{\epsilon}\|_k$  is bounded, so that expectations are well defined as Bochner integrals (see Berliner and Thomas-Agnan, 2004, Ch. 4, Sec. 5). Applying these results to Equation 48 yields:

$$\begin{aligned} \forall f \in \mathcal{H}_k, \forall \mathbf{x} \in \mathcal{S}, \mathbb{E}_{P_{\mathbf{x}}}[f] &= \mathbb{E}_{\epsilon \sim P_{\epsilon}}[f^{\epsilon}(\mathbf{x})] \\ &= \langle \mathbb{E}_{\epsilon \sim P_{\epsilon}}[f^{\epsilon}], k(\cdot, \mathbf{x}) \rangle_k. \end{aligned} \quad (51)$$

Defining  $g' := \mathbb{E}_{\epsilon \sim P_{\epsilon}}[f^{\epsilon}]$  and restricting the domain to  $\mathcal{S}$ , set  $g := g'|_{\mathcal{S}} \in \mathcal{H}_k(\mathcal{S})$ . By the boundedness of the Bochner integral (see Mandrekar and Rüdiger, 2015, Ch. 2), which defines  $\mathbb{E}[f^{\epsilon}]$ , we know that:

$$\|g'\|_k = \|\mathbb{E}[f^{\epsilon}]\|_k \leq \mathbb{E}[\|f^{\epsilon}\|_k] = \|f\|_k. \quad (52)$$

Regarding the norm of the domain-restricted function, we then have that (Aronszajn, 1950):

$$\|g\|_{\mathcal{H}_k(\mathcal{S})} = \inf_{h \in \mathcal{H}_k: h|_{\mathcal{S}}=g} \|h\|_k \leq \|g'\|_k \leq \|f\|_k. \quad (53)$$

The result in Proposition 4 immediately follows, which concludes the proof.  $\square$

### A.5 Proof of Theorem 5

The proof for the main result concerning uGP-UCB will make use of the following background.

**Lemma 15** (Theorem 2.9 in Saitoh and Sawano (2016)). *Consider a kernel  $k : \mathcal{W} \times \mathcal{W} \rightarrow \mathbb{R}$  and an arbitrary mapping  $u : \mathcal{X} \rightarrow \mathcal{W}$ . Set*

$$\mathcal{Z}_u := \bigcap_{x \in \mathcal{X}} \text{Null}(E_{u(x)}) \subset \mathcal{H}_k, \quad (54)$$

where, given  $w \in \mathcal{W}$ ,  $E_w : \mathcal{H}_k \rightarrow \mathbb{R}$  denotes the evaluation functional at  $w$ , i.e.  $E_w[f] = f(w)$ , for  $f \in \mathcal{H}_k$ , and  $\text{Null}(E_w)$  denotes the null space of  $E_w$ . Let  $\mathbf{\Pi}$  denote the projection from  $\mathcal{H}_k$  to  $\mathcal{Z}_u^\perp$ , the orthogonal complement of  $\mathcal{Z}_u$  in  $\mathcal{H}_k$ . Defining  $k \circ u : \mathcal{X} \times \mathcal{X} \rightarrow \mathbb{R}$  by  $k \circ u(x, x') = k(u(x), u(x'))$ , for  $x, x' \in \mathcal{X}$ , we have the pullback  $\mathcal{H}_{k \circ u}$  described as:

$$\mathcal{H}_{k \circ u} = \{f \circ u \mid f \in \mathcal{H}_k\}, \quad (55)$$

which is equipped with an inner product satisfying:

$$\langle f \circ u, g \circ u \rangle_{k \circ u} = \langle \mathbf{\Pi}f, \mathbf{\Pi}g \rangle_k \quad (56)$$

for all  $f, g \in \mathcal{H}_k$ .

**Theorem 5** (uGP-UCB regret). *Let  $\delta \in (0, 1)$ ,  $f \in \mathcal{H}_k$ , and  $b \geq \|f\|_k$ . Consider  $\zeta_t$  as  $\sigma_\zeta$ -sub-Gaussian noise. Assume that both  $k$  and  $P_{\mathbf{x}}^E$  satisfy the conditions for  $\Delta f_{P_{\mathbf{x}}^E}$  to be  $\sigma_E$ -sub-Gaussian, for a given  $\sigma_E > 0$ , for all  $t \geq 1$ . Then, running uGP-UCB with:*

$$\beta_t = b + \sigma_\nu \sqrt{2(I(\mathbf{y}_{t-1}; \hat{\mathbf{f}}_{t-1} | \{P_{\mathbf{x}_i}^E\}_{i=1}^{t-1}) + 1 + \log(1/\delta))}, \quad (20)$$

where  $\sigma_\nu := \sqrt{\sigma_E^2 + \sigma_\zeta^2}$ , the uncertain-inputs cumulative regret satisfies:

$$\hat{R}_n \in \mathcal{O} \left( \sqrt{n \hat{\gamma}_n^E} \left( b + \sqrt{\hat{\gamma}_n^E + \log(1/\delta)} \right) \right) \quad (21)$$

with probability at least  $1 - \delta$ .

*Proof.* Let  $Q : \mathbf{x} \mapsto P_{\mathbf{x}}^E$  denote the map from target to query location distribution. We can then define a kernel  $\hat{k} \circ Q(\mathbf{x}, \mathbf{x}') := \hat{k}(Q(\mathbf{x}), Q(\mathbf{x}')) = \hat{k}(P_{\mathbf{x}}^E, P_{\mathbf{x}'}^E)$ ,  $\mathbf{x}, \mathbf{x}' \in \mathcal{S}$ . According to Lemma 15, the RKHS associated with  $\hat{k} \circ Q$  is given by:

$$\mathcal{H}_{\hat{k} \circ Q} = \{\hat{g} \circ Q \mid \hat{g} \in \mathcal{H}_{\hat{k}}\}, \quad (57)$$

equipped with an inner product whose associated norm is such that, for any  $\hat{g} \in \mathcal{H}_{\hat{k}}$ :

$$\|\hat{g} \circ Q\|_{\hat{k} \circ Q} = \|\mathbf{\Pi} \hat{g}\|_{\hat{k}} \leq \|\hat{g}\|_{\hat{k}}, \quad (58)$$

where  $\mathbf{\Pi}$  is the projection operator in Lemma 15.

Considering the RKHS in Equation 57, the result in Theorem 5 follows after a few steps. Firstly, by Lemma 1, for any  $f \in \mathcal{H}_k$ , there is a unique  $\hat{f} \in \mathcal{H}_{\hat{k}}$ , such that:

$$\hat{f} \circ Q(\mathbf{x}) = \hat{f}(P_{\mathbf{x}}^E) = \mathbb{E}[f(\tilde{\mathbf{x}}) | \mathbf{x}], \forall \mathbf{x} \in \mathcal{S}. \quad (59)$$

Then, letting  $g := \hat{f} \circ Q$  and using  $\hat{k} \circ Q$  as the GP kernel, we apply Theorem 8 to obtain a cumulative regret bound for  $g$  as an objective, analogously to Section A.2. From Equation 58 and Lemma 1, we also have that:

$$\|g\|_{\hat{k} \circ Q} \leq \|\hat{f}\|_{\hat{k}} = \|f\|_k \leq b. \quad (60)$$

Lastly, to avoid needing an explicit formulation for  $\hat{\gamma}_{t-1}^E$  to set  $\beta_t$ , the known current information gain  $I(\mathbf{y}_{t-1}; \hat{\mathbf{f}}_{t-1} | \{P_{\mathbf{x}_i}^E\}_{i=1}^{t-1})$  was instead used in the formulation of  $\beta_t$ . This replacement maintains the same bounds obtained by Chowdhury and Gopalan (2017, Appendix C) and applied in Theorem 8.

For a given  $\delta \in (0, 1)$ , Chowdhury and Gopalan arrive at the following result regarding a GP model with covariance  $k : \mathcal{S} \times \mathcal{S} \rightarrow \mathbb{R}$  and any function  $g \in \mathcal{H}_k$ :

$$\forall t \geq 0, \forall \mathbf{x} \in \mathcal{S} : |\mu_t(\mathbf{x}) - g(\mathbf{x})| \leq \sigma_t(\mathbf{x}) \left( b + \sigma_\nu \sqrt{2 \log \frac{\sqrt{|(1+\eta)\mathbf{I} + \mathbf{K}_t|}}{\delta}} \right) \quad (61)$$

with probability greater than  $1 - \delta$ , where we adjusted notation according to our setup. Observing that:

$$|(1+\eta)\mathbf{I} + \mathbf{K}_t| = |\mathbf{I} + (1+\eta)^{-1}\mathbf{K}_t| |(1+\eta)\mathbf{I}|, \quad (62)$$

the authors go on to show that:

$$\begin{aligned} \log |(1+\eta)\mathbf{I} + \mathbf{K}_t| &= \log |\mathbf{I} + (1+\eta)^{-1}\mathbf{K}_t| \\ &\quad + t \log(1+\eta) \\ &\leq 2\gamma_t + \eta t. \end{aligned} \quad (63)$$

Choosing  $\eta = 2/n$  in the last result and replacing it into Equation 61 leads to the formulation for  $\beta_t$  in Theorem 8. However, notice that:

$$\log |\mathbf{I} + (1+\eta)^{-1}\mathbf{K}_t| = 2I(\mathbf{y}_t; \mathbf{g}_t | \{\mathbf{x}_i\}_{i=1}^t). \quad (64)$$

Using this identity in Equation 63 and replacing it into Equation 61 yields the formulation for  $\beta_t$  in Theorem 5.

As in Section A.2, the result in Theorem 5 follows by noticing that the cumulative regret for  $g$ , as defined, is equivalent to the uncertain-inputs cumulative regret for  $f$ .  $\square$

### A.6 Proof of Proposition 6

**Proposition 6.** Consider a compact set  $\mathcal{S} \subset \mathcal{X}$ , a distribution  $P_\epsilon \in \mathcal{P}$ , with  $\mathbb{E}_{P_\epsilon}[\epsilon] = 0$ , and a set:

$$\mathcal{P}_\epsilon := \{P \in \mathcal{P} \mid \tilde{\mathbf{x}} = \hat{\mathbf{x}} + \epsilon, \hat{\mathbf{x}} \in \mathcal{S}, \epsilon \sim P_\epsilon, \tilde{\mathbf{x}} \sim P\}, \quad (22)$$

which is the set of location distributions with mean in  $\mathcal{S}$  and affected by i.i.d.  $P_\epsilon$ -noise. Assume that  $k: \mathcal{X} \times \mathcal{X} \rightarrow \mathbb{R}$  is translation invariant, and let  $\hat{k}: \mathcal{P} \times \mathcal{P} \rightarrow \mathbb{R}$  be defined according to Equation 9. Then we have that:

$$\forall n \geq 1, \quad \hat{\gamma}_n(\mathcal{P}_\epsilon) \leq \gamma_n, \quad (23)$$

where  $\hat{\gamma}_n$  is defined by Equation 19, and  $\gamma_n$  is the maximum information gain for  $\text{GP}(0, k)$ .

*Proof.* Let's consider the definitions of the information gain bounds. In the standard, deterministic-inputs case, the maximum information gain after  $n$  iterations for a model  $\text{GP}(0, k)$  is given by:

$$\gamma_n = \max_{\mathcal{Q} \subset \mathcal{S}: |\mathcal{Q}|=n} \frac{1}{2} \log |\mathbf{I} + \lambda^{-1} \mathbf{K}_{\mathcal{Q}}|, \quad (65)$$

where  $\mathbf{K}_{\mathcal{Q}} = [k(\mathbf{x}, \mathbf{x}')]_{\mathbf{x}, \mathbf{x}' \in \mathcal{Q}}$ . In the case of  $\text{GP}(0, \hat{k})$  taking inputs from  $\mathcal{P}_\epsilon$ , we have:

$$\hat{\gamma}_n(\mathcal{P}_\epsilon) = \sup_{\mathcal{R} \subset \mathcal{P}_\epsilon: |\mathcal{R}|=n} \frac{1}{2} \log |\mathbf{I} + \lambda^{-1} \hat{\mathbf{K}}_{\mathcal{R}}|, \quad (66)$$

where  $\hat{\mathbf{K}}_{\mathcal{R}} = [k(P, P')]_{P, P' \in \mathcal{R}}$ . Both cases have the same parameter  $\lambda > 0$ .

Considering the former definitions, observe that, if one can always find a set  $\mathcal{Q} \subset \mathcal{S}$  that provides larger information gain than  $\mathcal{R}$ , for every choice of  $\mathcal{R} \subset \mathcal{P}_\epsilon$ ,  $\gamma_n$  will then be larger than  $\hat{\gamma}_n(\mathcal{P}_\epsilon)$ . The information gain depends on the determinants of the matrices  $\mathbf{I} + \lambda^{-1} \mathbf{K}_{\mathcal{Q}}$  and  $\mathbf{I} + \lambda^{-1} \hat{\mathbf{K}}_{\mathcal{R}}$ , which is related to the positive-definiteness of both matrices.

A classic result in matrix analysis states that, if two  $n$ -by- $n$ -matrices  $\mathbf{A}$  and  $\mathbf{B}$  are positive definite, and  $\mathbf{A} - \mathbf{B}$  is positive semi-definite, their determinants satisfy  $|\mathbf{A}| \geq |\mathbf{B}|$  (see Horn and Johnson, 1985, Cor. 7.7.4). Recall that a matrix  $\mathbf{A} \in \mathbb{R}^{n \times n}$  is positive semi-definite if and only if  $\forall \alpha \in \mathbb{R}^n, \alpha^\top \mathbf{A} \alpha \geq 0$ , and positive definite if equality only holds for  $\alpha = \mathbf{0}$ . Hence, we shall prove that:

$$\forall \{P_i\}_{i=1}^n \subset \mathcal{P}_\epsilon, \quad \exists \{\mathbf{x}_i\}_{i=1}^n \subset \mathcal{S}: \quad \alpha^\top (\mathbf{K}_n - \hat{\mathbf{K}}_n) \alpha \geq 0, \quad \forall \alpha \in \mathbb{R}^n, \quad (67)$$

where  $[\mathbf{K}_n]_{ij} = k(\mathbf{x}_i, \mathbf{x}_j)$  and  $[\hat{\mathbf{K}}_n]_{ij} = \hat{k}(P_i, P_j)$ ,  $i, j \in \{1, \dots, n\}$ . For two positive semi-definite matrices  $\mathbf{A}, \mathbf{B} \in \mathbb{R}^{n \times n}$ , let  $\mathbf{A} \succcurlyeq \mathbf{B}$  denote that  $\mathbf{A} - \mathbf{B}$  is

positive semi-definite. Since:

$$\begin{aligned} \mathbf{K}_n \succcurlyeq \hat{\mathbf{K}}_n &\implies \mathbf{I} + \lambda^{-1} \mathbf{K}_n \succcurlyeq \mathbf{I} + \lambda^{-1} \hat{\mathbf{K}}_n \\ &\implies |\mathbf{I} + \lambda^{-1} \mathbf{K}_n| \geq |\mathbf{I} + \lambda^{-1} \hat{\mathbf{K}}_n| \\ &\implies \log |\mathbf{I} + \lambda^{-1} \mathbf{K}_n| \geq \log |\mathbf{I} + \lambda^{-1} \hat{\mathbf{K}}_n|, \end{aligned} \quad (68)$$

the condition in Equation 67, if satisfied, then implies that  $\gamma_n \geq \hat{\gamma}_n(\mathcal{P}_\epsilon)$ .

For a given  $\{P_i\}_{i=1}^n \subset \mathcal{P}_\epsilon$ , define  $\tilde{\mathbf{x}}_i \sim P_i \in \mathcal{P}_\epsilon$ , for each  $i \in \{1, \dots, n\}$ . By the definition of  $\mathcal{P}_\epsilon$ , we also have that each  $\tilde{\mathbf{x}}_i = \hat{\mathbf{x}}_i + \epsilon_i$ , with  $\hat{\mathbf{x}}_i \in \mathcal{S}$  and  $\epsilon_i \sim P_\epsilon$ . Recall that, for any  $P, P' \in \mathcal{P}$ ,  $\hat{k}(P, P') = \langle \psi_P, \psi_{P'} \rangle_k$  and  $\psi_P = \mathbb{E}[k(\cdot, \tilde{\mathbf{x}})]$ ,  $\tilde{\mathbf{x}} \sim P$ . Then we can write:

$$\begin{aligned} \forall \alpha \in \mathbb{R}^n, \quad \alpha^\top \hat{\mathbf{K}}_n \alpha &= \sum_{i=1}^n \sum_{j=1}^n \alpha_i \alpha_j \hat{k}(P_i, P_j) \\ &= \sum_{i=1}^n \sum_{j=1}^n \alpha_i \alpha_j \langle \psi_{P_i}, \psi_{P_j} \rangle_k \\ &= \left\| \sum_{i=1}^n \alpha_i \psi_{P_i} \right\|_k^2 \\ &= \left\| \sum_{i=1}^n \alpha_i \mathbb{E}[k(\cdot, \hat{\mathbf{x}}_i + \epsilon_i)] \right\|_k^2. \end{aligned} \quad (69)$$

Now, as  $\epsilon_i$  are i.i.d. random variables, for any  $\epsilon \sim P_\epsilon$ , it holds that:

$$\forall i \in \{1, \dots, n\}, \quad \mathbb{E}[k(\cdot, \hat{\mathbf{x}}_i + \epsilon_i)] = \mathbb{E}[k(\cdot, \hat{\mathbf{x}}_i + \epsilon)]. \quad (70)$$

Applying this identity, we have that:

$$\begin{aligned} \forall \alpha \in \mathbb{R}^n, \quad \alpha^\top \hat{\mathbf{K}}_n \alpha &= \left\| \mathbb{E} \left[ \sum_{i=1}^n \alpha_i k(\cdot, \hat{\mathbf{x}}_i + \epsilon_i) \right] \right\|_k^2 \\ &= \left\| \mathbb{E} \left[ \sum_{i=1}^n \alpha_i k(\cdot, \hat{\mathbf{x}}_i + \epsilon) \right] \right\|_k^2 \\ &\leq \mathbb{E} \left[ \left\| \sum_{i=1}^n \alpha_i k(\cdot, \hat{\mathbf{x}}_i + \epsilon) \right\|_k^2 \right] \\ &= \mathbb{E} \left[ \sum_{i=1}^n \sum_{j=1}^n \alpha_i \alpha_j k(\hat{\mathbf{x}}_i + \epsilon, \hat{\mathbf{x}}_j + \epsilon) \right] \\ &= \sum_{i=1}^n \sum_{j=1}^n \alpha_i \alpha_j k(\hat{\mathbf{x}}_i, \hat{\mathbf{x}}_j) \\ &= \alpha^\top \mathbf{K}_n \alpha, \end{aligned} \quad (71)$$

where the first inequality follows from the boundedness of the Bochner integral (Mandrekar and Rüdiger, 2015,

Ch. 2), the fourth equality follows from  $k$ 's translation invariance, and  $\mathbf{K}_n$  is defined by  $[\mathbf{K}_n]_{ij} = k(\hat{\mathbf{x}}_i, \hat{\mathbf{x}}_j)$ . Therefore, the set of mean locations  $\{\hat{\mathbf{x}}_i\}_{i=1}^n$  satisfies the condition in Equation 67, leading to the result in Proposition 6, which concludes the proof.  $\square$

### A.7 Proof of Proposition 7

The proof for Proposition 7 will make use of the following background. For further details, we refer the reader to Bauer (1981) and Boucheron et al. (2013).

**Definition 16** (Absolute continuity). *A measure  $V$  on a  $\sigma$ -algebra  $\mathfrak{X}$  is said to be absolutely continuous relative to a measure  $U$  on  $\mathfrak{X}$  if every  $U$ -null set is also a  $V$ -null set.*

Given a measure  $M$  on  $\mathfrak{X}$ , a  $M$ -null set is simply any set  $\mathcal{U} \in \mathfrak{X}$ , such that  $M[\mathcal{U}] = 0$ .

**Definition 17** (Kullback-Leibler divergence). *Let  $P$  and  $P'$  be two probability measures on  $(\mathcal{X}, \mathfrak{X})$ . The Kullback-Leibler divergence between the two measures is defined as:*

$$D_{\text{KL}}(P' \| P) := \int \log \frac{dP'}{dP} dP', \quad (72)$$

case  $P'$  is absolutely continuous relative to  $P$ , or  $\infty$  otherwise.

**Lemma 18** (Pinsker's inequality). *Let  $P$  and  $P'$  be two probability measures on  $(\mathcal{X}, \mathfrak{X})$ , and let  $U$  be a common dominating measure of  $P$  and  $P'$ . Assume that  $P'$  is absolutely continuous relative to  $P$ . Then it holds that:*

$$\int_{\mathcal{X}} |p(\mathbf{x}) - p'(\mathbf{x})| dU(\mathbf{x}) \leq \sqrt{\frac{1}{2} D_{\text{KL}}(P' \| P)}, \quad (73)$$

where  $p = \frac{dP}{dU}$  and  $p' = \frac{dP'}{dU}$  are the respective densities of each probability measure.

Now we can proceed to the proof of Proposition 7, which is restated below.

**Proposition 7.** *Let  $\mathcal{X} = \mathbb{R}^d$ ,  $f \in \mathcal{H}_k$  and  $\|f\|_k \leq b$ . Assume that, for any  $\mathbf{x} \in \mathcal{S} \subset \mathcal{X}$ , the query distribution  $P_{\mathbf{x}}^E$  is Gaussian with mean  $\mathbf{x}$  and positive-definite covariance  $\Sigma^E$ . Then, using a Gaussian model  $\hat{P}_{\mathbf{x}}$  with same mean and a given constant positive-definite covariance matrix  $\hat{\Sigma}$ , we have that for any  $\mathbf{x} \in \mathcal{S}$ :*

$$\left| \mathbb{E}_{P_{\mathbf{x}}^E}[f] - \mathbb{E}_{\hat{P}_{\mathbf{x}}}[f] \right| \leq \frac{b}{2} \sqrt{\text{tr}(\hat{\Sigma}^{-1} \Sigma^E) - d + \log \frac{|\hat{\Sigma}|}{|\Sigma^E|}}.$$

*Proof.* Proposition 7 refers to the approximation error between the model  $\hat{P}_{\mathbf{x}}$  and the actual distribution  $P_{\mathbf{x}}^E$  in terms of difference in the expected value of a function  $f \in \mathcal{H}_k$ . The result simply follows by applying Pinsker's inequality (Lemma 18).

For any  $t \geq 1$  and  $\mathbf{x} \in \mathcal{S}$ , let  $\hat{p}_{\mathbf{x}}$  and  $p_{\mathbf{x}}$  denote the probability density functions of  $\hat{P}_{\mathbf{x}}$  and  $P_{\mathbf{x}}^E$ , respectively. Then we have that:

$$\begin{aligned} \left| \mathbb{E}_{P_{\mathbf{x}}^E}[f] - \mathbb{E}_{\hat{P}_{\mathbf{x}}}[f] \right| &= \left| \int_{\mathcal{X}} f(\mathbf{x}') (p_{\mathbf{x}}(\mathbf{x}') - \hat{p}_{\mathbf{x}}(\mathbf{x}')) d\mathbf{x}' \right| \\ &\leq \|f\|_{\infty} \int_{\mathcal{X}} |p_{\mathbf{x}}(\mathbf{x}') - \hat{p}_{\mathbf{x}}(\mathbf{x}')| d\mathbf{x}'. \end{aligned} \quad (74)$$

Now note that, by the Cauchy-Schwartz inequality and  $k$ 's reproducing property, for any  $\mathbf{x} \in \mathcal{X}$ :

$$\begin{aligned} \|f\|_{\infty} &= \sup_{\mathbf{x} \in \mathcal{X}} |f(\mathbf{x})| \\ &= \sup_{\mathbf{x} \in \mathcal{X}} |\langle f, k(\cdot, \mathbf{x}) \rangle_k| \\ &\leq \sup_{\mathbf{x} \in \mathcal{X}} \|f\|_k \sqrt{k(\mathbf{x}, \mathbf{x})} \\ &\leq \|f\|_k, \end{aligned} \quad (75)$$

since  $k(\mathbf{x}, \mathbf{x}) \leq 1$  under our regularity assumptions.

As both  $\hat{P}_{\mathbf{x}}$  and  $P_{\mathbf{x}}^E$  are Gaussian measures, their support is the whole  $\mathcal{X}$ , so that they are absolutely continuous with respect to each other. Then we can apply Pinsker's inequality to upper bound the remaining term in Equation 74, which yields:

$$\begin{aligned} \int_{\mathcal{X}} |p_{\mathbf{x}}(\mathbf{x}') - \hat{p}_{\mathbf{x}}(\mathbf{x}')| d\mathbf{x}' &= \int_{\mathcal{X}} |\hat{p}_{\mathbf{x}}(\mathbf{x}') - p_{\mathbf{x}}(\mathbf{x}')| d\mathbf{x}' \\ &\leq \sqrt{\frac{1}{2} D_{\text{KL}}(P_{\mathbf{x}}^E \| \hat{P}_{\mathbf{x}})}. \end{aligned} \quad (76)$$

Plugging this result and the one in Equation 75 back into Equation 74 yields:

$$\begin{aligned} \forall t \geq 1, \forall \mathbf{x} \in \mathcal{S}, \\ \left| \mathbb{E}_{P_{\mathbf{x}}^E}[f] - \mathbb{E}_{\hat{P}_{\mathbf{x}}}[f] \right| &\leq \|f\|_k \sqrt{\frac{1}{2} D_{\text{KL}}(P_{\mathbf{x}}^E \| \hat{P}_{\mathbf{x}})}. \end{aligned} \quad (77)$$

The Kullback-Leibler divergence between two Gaussian distributions on  $\mathbb{R}^d$ ,  $P_{\mathbf{x}}^E$  and  $\hat{P}_{\mathbf{x}}$ , with covariance matrices as stated and same mean vectors is given by:

$$D_{\text{KL}}(P_{\mathbf{x}}^E \| \hat{P}_{\mathbf{x}}) = \frac{1}{2} \left( \text{tr}(\hat{\Sigma}^{-1} \Sigma^E) - d + \log \frac{|\hat{\Sigma}|}{|\Sigma^E|} \right), \quad (78)$$

which comes from a known result (Rasmussen and Williams, 2006, p. 203) and the fact that:

$$\text{tr}(\hat{\Sigma}^{-1} (\Sigma^E - \hat{\Sigma})) = \text{tr}(\hat{\Sigma}^{-1} \Sigma^E - \mathbf{I}) = \text{tr}(\hat{\Sigma}^{-1} \Sigma^E) - d. \quad (79)$$

Replacing Equation 78 into Equation 77 yields the result in Proposition 7.  $\square$

## A.8 The uncertain-inputs squared-exponential kernel

Here we present the formulation for the uncertain-inputs squared exponential kernel when both inputs follow a Gaussian distribution. This formulation is the analytical solution for Equation 9 under these settings, and is also found in Girard (2004, Eq. 3.53). Here we present it as follows:

$$\hat{k}(N(\hat{\mathbf{x}}, \Sigma), N(\hat{\mathbf{x}}', \Sigma')) = \frac{\sigma_f^2 \exp\left(-\frac{1}{2}(\hat{\mathbf{x}} - \hat{\mathbf{x}}')^\top (\mathbf{W} + \Sigma + \Sigma')^{-1} (\hat{\mathbf{x}} - \hat{\mathbf{x}}')\right)}{|\mathbf{I} + \mathbf{W}^{-1}(\Sigma + \Sigma')|^{1/2}}, \quad (80)$$

where  $\sigma_f^2$  is a signal variance parameter, set to 1 in our experiments, and  $\mathbf{W}$  is a diagonal squared length-scales matrix. We used Equation 80 to implement the GP covariance function for uGP-UCB in the experiments, while the other methods were configured with the deterministic-inputs squared-exponential kernel.

## References

- N. Aronszajn. Theory of Reproducing Kernels. *Transactions of the American Mathematical Society*, 68(3):337–404, 1950.
- H. Bauer. *Probability theory and elements of measure theory*. Probability and mathematical statistics. Academic Press, 1981.
- Justin J. Beland and Prasanth B. Nair. Bayesian Optimization Under Uncertainty. In *31st Conference on Neural Information Processing Systems (NIPS 2017) Workshop on Bayesian optimization (BayesOpt 2017)*, Long Beach, CA, 2017.
- Alain Berlinet and Christine Thomas-Agnan. *Reproducing kernel Hilbert spaces in probability and statistics*. Kluwer Academic Publishers, 2004.
- Stéphane Boucheron, Gábor Lugosi, and Pascal Massart. *Concentration inequalities: A Nonasymptotic Theory of Independence*. Oxford University Press, 2013.
- Adam D. Bull. Convergence Rates of Efficient Global Optimization Algorithms. *Journal of Machine Learning Research (JMLR)*, 12:2879–2904, 2011.
- Sayak Ray Chowdhury and Aditya Gopalan. On Kernelized Multi-armed Bandits. In *Proceedings of the 34th International Conference on Machine Learning (ICML)*, Sydney, Australia, 2017.
- Patrick Dallaire, Camille Besse, and Brahim Chaib-Draa. An approximate inference with Gaussian process to latent functions from uncertain data. *Neurocomputing*, 74:1945–1955, 2011.
- Agathe Girard. *Approximate methods for propagation of uncertainty with Gaussian process models*. Ph. d, University of Glasgow, 2004.
- Roger A. Horn and Charles R. Johnson. *Matrix Analysis*. Cambridge University Press, 1985.
- Erwin Kreyszig. *Introductory functional analysis with applications*. John Wiley & Sons, 1978.
- Henry Lam. Advanced tutorial: input uncertainty and robust analysis in stochastic simulation. In *Proceedings of the 2016 Winter Simulation Conference*, pages 178–192, 2016.
- Chun Kai Ling, Kian Hsiang Low, and Patrick Jaillet. Gaussian Process Planning with Lipschitz Continuous Reward Functions: Towards Unifying Bayesian Optimization, Active Learning, and Beyond. In *AAAI Conference on Artificial Intelligence*, 2016.
- Vidyadhar Mandrekar and Barbara Rüdiger. *Stochastic integration in Banach spaces: Theory and Applications*, volume 73. Springer, 2015.
- Roman Marchant and Fabio Ramos. Bayesian Optimisation for Intelligent Environmental Monitoring. In *IEEE/RSJ International Conference on Intelligent Robots and Systems (IROS)*. IEEE, October 2012.
- Roman Marchant and Fabio Ramos. Bayesian Optimisation for Informative Continuous Path Planning. In *IEEE International Conference on Robotics and Automation (ICRA)*, pages 6136–6143, 2014.
- Colin McDiarmid. *On the method of bounded differences*, page 148188. London Mathematical Society Lecture Note Series. Cambridge University Press, 1989.
- Andrew Mchutchon and Carl E. Rasmussen. Gaussian Process Training with Input Noise. In *Advances in Neural Information Processing Systems*, pages 1341–1349, 2011.
- Krikamol Muandet, Kenji Fukumizu, Francesco Dinuzzo, and Bernhard Schölkopf. Learning from Distributions via Support Measure Machines. In *Proceeding of the 26th Annual Conference on Neural Information Processing Systems (NIPS 2012)*, 2012.
- Krikamol Muandet, Kenji Fukumizu, Bharath Sriperumbudur, and Bernhard Schölkopf. Kernel Mean Embedding of Distributions: A Review and Beyond. *arXiv*, 2016.
- José Nogueira, Ruben Martinez-Cantin, Alexandre Bernardino, and Lorenzo Jamone. Unscented Bayesian Optimization for Safe Robot Grasping. In *IEEE/RSJ International Conference on Intelligent Robots and Systems (IROS)*, Daejeon, Korea, 2016.



- Rafael Oliveira, Lionel Ott, Vitor Guizlini, and Fabio Ramos. Bayesian Optimisation for Safe Navigation under Localisation Uncertainty. In *International Symposium on Robotics Research (ISRR) (to appear)*, Puerto Varas, Chile, 2017.
- Michael Pearce and Juergen Branke. Bayesian simulation optimization with input uncertainty. In W. K. V. Chan, A. D’Ambrogio, G. Zacharewicz, N. Mustafee, G. Wainer, and E. Page, editors, *Proceedings of the 2017 Winter Simulation Conference*, pages 2268–2278. IEEE, 2017.
- Carl E. Rasmussen and Christopher K. I. Williams. *Gaussian Processes for Machine Learning*. The MIT Press, Cambridge, MA, 2006.
- Saburo Saitoh and Yoshihiro Sawano. *Theory of Reproducing Kernels and Applications*. Springer, 2016.
- Bernhard Schölkopf and Alexander J. Smola. *Learning with kernels: support vector machines, regularization, optimization, and beyond*. MIT Press, Cambridge, Mass, 2002.
- Bobak Shahriari, Kevin Swersky, Ziyu Wang, Ryan P. Adams, and Nando De Freitas. Taking the human out of the loop: A review of Bayesian optimization. *Proceedings of the IEEE*, 104(1):148–175, 2016.
- Jasper Snoek, Hugo Larochelle, and Ryan P. Adams. Practical bayesian optimization of machine learning algorithms. In F. Pereira, C. J. C. Burges, L. Bottou, and K. Q. Weinberger, editors, *Advances in Neural Information Processing Systems 25*, pages 2951–2959. Curran Associates, Inc., 2012.
- Niranjan Srinivas, Andreas Krause, Sham M. Kakade, and Matthias Seeger. Gaussian Process Optimization in the Bandit Setting: No Regret and Experimental Design. In *Proceedings of the 27th International Conference on Machine Learning (ICML 2010)*, pages 1015–1022, 2010.
- Bharath K. Sriperumbudur, Kenji Fukumizu, and Gert R. G. Lanckriet. Universality, Characteristic Kernels and RKHS Embedding of Measures. *Journal of Machine Learning Research (JMLR)*, 12:2389–2410, 2011.
- Ingo Steinwart and Andreas Christmann. *Support Vector Machines*, chapter 4, pages 110–163. Springer New York, New York, NY, 2008.
- Sebastian Thrun, Wolfram Burgard, and Dieter Fox. *Probabilistic Robotics*. The MIT Press, Cambridge, MA, 2006.
- Saul Toscano-Palmerin and Peter I. Frazier. Bayesian Optimization with Expensive Integrands. *arXiv*, 2018.
- Charlie Vanaret, Jean-Baptiste Gotteland, Nicolas Durand, and Jean-Marc Alliot. Certified Global Minima for a Benchmark of Difficult Optimization Problems. Technical report, hal-00996713, 2014. Preprint.
- Eric A. Wan and Rudolph van der Merwe. The Unscented Kalman Filter for Nonlinear Estimation. In *Adaptive Systems for Signal Processing, Communications, and Control Symposium (AS-SPCC)*, pages 153–158, 2000. ISBN 0780384822.
- Aaron Wilson, Alan Fern, and Prasad Tadepalli. Using trajectory data to improve bayesian optimization for reinforcement learning. *Journal of Machine Learning Research*, 15:253–282, 2014.
